# Supplementary material for: Use of a Web-Based Dietary Assessment Tool (RiksmatenFlex) in Swedish Adolescents: Comparison and Validation Study
Source: PubMed Central journal article supplement (PMC6914230; doi:10.2196/12572), 2019-10-04
Supplement: jmir_v21i10e12572_app2.pdf [file jmir_v21i10e12572_app2.pdf]

| Number | Food item (Swedish)                                        | Food item                                                                            | Main food group (Swedish)            | Main food group           | Study <sup>a</sup> |
|--------|------------------------------------------------------------|--------------------------------------------------------------------------------------|--------------------------------------|---------------------------|--------------------|
| 536    | Kelp                                                       | Kelp dried                                                                           | Algprodukter                         | Algae                     | 1                  |
| 3973   | Bönor kokta konserv                                        | Beans tinned                                                                         | Baljväxter (bönor, linser och ärter) | Leguminous plant          | 1                  |
| 5742   | Groddar                                                    | Sprouts unspec.                                                                      | Baljväxter (bönor, linser och ärter) | Leguminous plant          | 1                  |
| 5741   | Gröna bönor ospec                                          | Green beans unspec.                                                                  | Baljväxter (bönor, linser och ärter) | Leguminous plant          | 1                  |
| 373    | Gröna ärtor                                                | Green peas                                                                           | Baljväxter (bönor, linser och ärter) | Leguminous plant          | 1                  |
| 3815   | Kikärtor konserv                                           | Chickpeas canned                                                                     | Baljväxter (bönor, linser och ärter) | Leguminous plant          | 1                  |
| 3926   | Linser kokta med salt                                      | Lentils dried boiled w/ salt                                                         | Baljväxter (bönor, linser och ärter) | Leguminous plant          | 1                  |
| 3308   | Sockerärtor kokta m salt                                   | Sugar pea boiled w/ salt                                                             | Baljväxter (bönor, linser och ärter) | Leguminous plant          | 1                  |
| 1431   | Blodpudding blodkorv fett 13% stekt                        | Black pudding fat 13% fried                                                          | Blodprodukter blodrätter             | Blood products and dishes | 1                  |
| 1433   | Paltbröd kokt                                              | Blood bread boiled                                                                   | Blodprodukter blodrätter             | Blood products and dishes | 1                  |
| 1224   | Hönsbuljong ätfärdig                                       | Chicken stock RTE                                                                    | Buljong                              | Bouillon                  | 1                  |
| 1621   | Amerikanska cookies choklad                                | American chocolate cookies                                                           | Bullar kakor tårter mm               | Buns cakes cookies        | 1                  |
| 1677   | Amerikanska muffins ospec                                  | American muffins unspec.                                                             | Bullar kakor tårter mm               | Buns cakes cookies        | 1                  |
| 5833   | Brownie                                                    | Brownie                                                                              | Bullar kakor tårter mm               | Buns cakes cookies        | 1                  |
| 1888   | Chokladbollar                                              | Chocolate balls wholemeal                                                            | Bullar kakor tårter mm               | Buns cakes cookies        | 1                  |
| 5612   | Daimtårta                                                  | Daim cake                                                                            | Bullar kakor tårter mm               | Buns cakes cookies        | 1                  |
| 5582   | Dubbla kex kaka med fyllning                               | Double biscuit                                                                       | Bullar kakor tårter mm               | Buns cakes cookies        | 1                  |
| 5580   | Enkla kex kakor små                                        | Biscuit small                                                                        | Bullar kakor tårter mm               | Buns cakes cookies        | 1                  |
| 5581   | Enkla kex kakor stora                                      | Biscuit large                                                                        | Bullar kakor tårter mm               | Buns cakes cookies        | 1                  |
| 1602   | Fyllt vetebröd bullar längd ospec.                         | Sweet wheat bread filled                                                             | Bullar kakor tårter mm               | Buns cakes cookies        | 1                  |
| 5611   | Gräddtårta ospec                                           | Cream cake                                                                           | Bullar kakor tårter mm               | Buns cakes cookies        | 1                  |
| 5607   | Kanelgiffel                                                | Cinnamon bun crescent                                                                | Bullar kakor tårter mm               | Buns cakes cookies        | 1                  |
| 5583   | Kex kaka med chokladöverdrag                               | Biscuit w/ chocolate coating                                                         | Bullar kakor tårter mm               | Buns cakes cookies        | 1                  |
| 3591   | Kladdkaka                                                  | Chocolate mud cake                                                                   | Bullar kakor tårter mm               | Buns cakes cookies        | 1                  |
| 5610   | Konditorbit                                                | Mazarin bisque punch roll                                                            | Bullar kakor tårter mm               | Buns cakes cookies        | 1                  |
| 1638   | Mandelbiskvier                                             | Almond macaroons                                                                     | Bullar kakor tårter mm               | Buns cakes cookies        | 1                  |
| 1626   | Maräng                                                     | Meringue                                                                             | Bullar kakor tårter mm               | Buns cakes cookies        | 1                  |
| 4200   | Marängtårta                                                | Meringue cake (Pavlova)                                                              | Bullar kakor tårter mm               | Buns cakes cookies        | 1                  |
| 1678   | Mjuk kaka sockerkaka mjuk pepparkaka                       | Sponge cake gingerbread cake                                                         | Bullar kakor tårter mm               | Buns cakes cookies        | 1                  |
| 2129   | Morotskaka                                                 | Carrot cake                                                                          | Bullar kakor tårter mm               | Buns cakes cookies        | 1                  |
| 3055   | Muffins                                                    | Muffin queen cake                                                                    | Bullar kakor tårter mm               | Buns cakes cookies        | 1                  |
| 1880   | Mums-mums                                                  | Mums-mums raw meringue on wafer covered w/ chocolate                                 | Bullar kakor tårter mm               | Buns cakes cookies        | 1                  |
| 5608   | Munk ospec                                                 | Donut unspec.                                                                        | Bullar kakor tårter mm               | Buns cakes cookies        | 1                  |
| 1624   | Pepparkakor                                                | Gingerbread biscuits                                                                 | Bullar kakor tårter mm               | Buns cakes cookies        | 1                  |
| 1648   | Prinsesstårta fylld m gräde vaniljkräm hallonsylt marsipan | Layer cake filled w/ whipped cream vanilla custard raspberry jam covered w/ marzipan | Bullar kakor tårter mm               | Buns cakes cookies        | 1                  |
| 1610   | Saffransbröd                                               | Sweet wheat bread w/ saffron                                                         | Bullar kakor tårter mm               | Buns cakes cookies        | 1                  |
| 1668   | Semla                                                      | Sweet wheat bun filled w/ whipped cream and almond paste                             | Bullar kakor tårter mm               | Buns cakes cookies        | 1                  |

<sup>a</sup> Foods in validation study and main survey Riksmaten ungdom 2016-17 = 1; Foods in main survey, only = 2; Foods in validation study, only = 3

| Number | Food item (Swedish)                                           | Food item                                                  | Main food group (Swedish) | Main food group                        | Study <sup>a</sup> |
|--------|---------------------------------------------------------------|------------------------------------------------------------|---------------------------|----------------------------------------|--------------------|
| 1594   | Sött vetebröd kanelbullar hembakta                            | Sweet wheat bread cinnamon buns home-made                  | Bullar kakor tårter mm    | Buns cakes cookies                     | 1                  |
| 1612   | Wafers fyllda rån kex                                         | Filled wafers biscuits                                     | Bullar kakor tårter mm    | Buns cakes cookies                     | 1                  |
| 1603   | Veteskorpor                                                   | Wheat rusks                                                | Bullar kakor tårter mm    | Buns cakes cookies                     | 1                  |
| 1608   | Wienerbröd fyllt m vaniljkräm sylt florsocker                 | Danish pastry filled w/ vanilla custard jam powdered sugar | Bullar kakor tårter mm    | Buns cakes cookies                     | 1                  |
| 554    | Björnbär                                                      | Blackberries                                               | Bär färska frysta         | Berries fresh frozen                   | 1                  |
| 555    | Blåbär                                                        | Blueberries                                                | Bär färska frysta         | Berries fresh frozen                   | 1                  |
| 594    | Bär färska                                                    | Berries fresh                                              | Bär färska frysta         | Berries fresh frozen                   | 1                  |
| 523    | Hallon                                                        | Raspberries                                                | Bär färska frysta         | Berries fresh frozen                   | 1                  |
| 526    | Jordgubbar                                                    | Strawberries                                               | Bär färska frysta         | Berries fresh frozen                   | 1                  |
| 2843   | Vinbär                                                        | Currant                                                    | Bär färska frysta         | Berries fresh frozen                   | 1                  |
| 1587   | Chips smaksatta fett 34%                                      | Crisps flavoured 34% fat                                   | Chips popcorn o dyl       | Crisps, popcorn, etc.                  | 1                  |
| 3238   | Frasiga figurer typ skruvar (snacks)                          | Crispy potato snacks                                       | Chips popcorn o dyl       | Crisps, popcorn, etc.                  | 1                  |
| 1589   | Japanmix nötter typ Exotic snacks                             | Mixed savory snacks                                        | Chips popcorn o dyl       | Crisps, popcorn, etc.                  | 1                  |
| 1580   | Jordnötsbågar jordnötsringar                                  | Peanut doodles or rings                                    | Chips popcorn o dyl       | Crisps, popcorn, etc.                  | 1                  |
| 1582   | Ostbågar                                                      | Cheese doodles (cheese-flavored cheese puffs)              | Chips popcorn o dyl       | Crisps, popcorn, etc.                  | 1                  |
| 1586   | Popcorn mikro fett 22%                                        | Popcorn microwave fat 22%                                  | Chips popcorn o dyl       | Crisps, popcorn, etc.                  | 1                  |
| 4072   | Räkchips                                                      | Crisps shrimp taste                                        | Chips popcorn o dyl       | Crisps, popcorn, etc.                  | 1                  |
| 1585   | Salta pinnar                                                  | Salted sticks                                              | Chips popcorn o dyl       | Crisps, popcorn, etc.                  | 1                  |
| 1581   | Tortilla chips                                                | Corn crisps                                                | Chips popcorn o dyl       | Crisps, popcorn, etc.                  | 1                  |
| 5600   | Choklad lösgodis                                              | Chocolate bulk confectionary                               | Choklad                   | Chocolate                              | 1                  |
| 5605   | Choklad med fyllning ospec                                    | Chocolate w/ toffee center unspec.                         | Choklad                   | Chocolate                              | 1                  |
| 5702   | Mjölchoklad                                                   | Milk chocolate unspec.                                     | Choklad                   | Chocolate                              | 1                  |
| 2052   | Mörk choklad kakao >70 %                                      | Dark chocolate cocoa >70%                                  | Choklad                   | Chocolate                              | 1                  |
| 5152   | Alkoläsk kolsyrad dryck vol. % 4-5                            | Soft drink w/ alcohol vol. % 4-5                           | Cider alkoläsk drink      | Cider, soft drink with alcohol, drinks | 1                  |
| 3288   | Cider 2,25 %                                                  | Cider vol. % 2.25                                          | Cider alkoläsk drink      | Cider, soft drink with alcohol, drinks | 1                  |
| 3111   | Cider med ca 4.5 % alkohol                                    | Cider vol. % 4.5                                           | Cider alkoläsk drink      | Cider, soft drink with alcohol, drinks | 1                  |
| 1929   | Irish coffee                                                  | Irish Coffee                                               | Cider alkoläsk drink      | Cider, soft drink with alcohol, drinks | 1                  |
| 4256   | Long drink - starksprit (ca 4-6 cl) blandat med läsk el juice | Long drink (ca 4-6 cl spirits)                             | Cider alkoläsk drink      | Cider, soft drink with alcohol, drinks | 1                  |
| 4260   | Vinbål                                                        | Punch w/ wine                                              | Cider alkoläsk drink      | Cider, soft drink with alcohol, drinks | 1                  |
| 105    | Camembert vitmögelost lätt fett 11%                           | Camembert cheese white mould ripened low fat fat 11%       | Dessertost                | Soft cheese                            | 1                  |

<sup>a</sup> Foods in validation study and main survey Riksmaten ungdom 2016-17 = 1; Foods in main survey, only = 2; Foods in validation study, only = 3

| Number | Food item (Swedish)                               | Food item                                                                | Main food group (Swedish)          | Main food group           | Study <sup>a</sup> |
|--------|---------------------------------------------------|--------------------------------------------------------------------------|------------------------------------|---------------------------|--------------------|
| 111    | Getost chèvre vitmögelost fett 25%                | Cheese chèvre french goat milk white mold ripened fat 25%                | Dessertost                         | Soft cheese               | 1                  |
| 2900   | Ost dessertost                                    | Cheese for dessert                                                       | Dessertost                         | Soft cheese               | 1                  |
| 3267   | Baklava                                           | Baklava                                                                  | Efterrätter                        | Dessert                   | 1                  |
| 1784   | Cheesecake m botten av digestivekex               | Cheese cake w/ crust made of digestive biscuits                          | Efterrätter                        | Dessert                   | 1                  |
| 1764   | Chokladpudding                                    | Chocolate fool or chocolate pudding                                      | Efterrätter                        | Dessert                   | 1                  |
| 1775   | Citronfromage                                     | Lemon mousse                                                             | Efterrätter                        | Dessert                   | 1                  |
| 732    | Fattiga riddare                                   | Bread slices dipped in egg batter fried ('poor knights')                 | Efterrätter                        | Dessert                   | 1                  |
| 1790   | Friterad banan                                    | Deep fried banana                                                        | Efterrätter                        | Dessert                   | 1                  |
| 5848   | Frukt bär m vit choklad gratinerat                | Fruit berries w/ white chocolate gratinated                              | Efterrätter                        | Dessert                   | 1                  |
| 1761   | Marängsviss hovdessert                            | Meringues and whipped cream decorated w/ chocolate sauce 'court dessert' | Efterrätter                        | Dessert                   | 1                  |
| 2184   | Ostkaka fett 7%                                   | Swedish cheese cake fat 7%                                               | Efterrätter                        | Dessert                   | 1                  |
| 1787   | Paj efterrätt ospec                               | Sweet pie (pie as a dessert unspec.)                                     | Efterrätter                        | Dessert                   | 1                  |
| 3008   | Pannacotta                                        | Vanilla pudding Panna cotta                                              | Efterrätter                        | Dessert                   | 1                  |
| 1781   | Rabarberpaj                                       | Rhubarb pie                                                              | Efterrätter                        | Dessert                   | 1                  |
| 838    | Ris à la Malta                                    | Glorified rice                                                           | Efterrätter                        | Dessert                   | 1                  |
| 839    | Risgrynskaka el risgrynspudding                   | Rice pudding                                                             | Efterrätter                        | Dessert                   | 1                  |
| 2886   | Tiramisu                                          | Tiramisu                                                                 | Efterrätter                        | Dessert                   | 1                  |
| 1791   | Ugnstekt äpple                                    | Baked apples                                                             | Efterrätter                        | Dessert                   | 1                  |
| 1782   | Äppelpaj                                          | Apple pie                                                                | Efterrätter                        | Dessert                   | 1                  |
| 5691   | Portionsyoghurt                                   | Small yoghurt pot size                                                   | Fil yoghurt o syrade produkter     | Fermented milk products   | 1                  |
| 5698   | Portionsyoghurt med müsli                         | Small yoghurt pot size w/ müsli                                          | Fil yoghurt o syrade produkter     | Fermented milk products   | 1                  |
| 1271   | Sardiner i olja konserv                           | Sardines canned in oil                                                   | Fisk färsk fryst kokt              | Fish fresh frozen cooked  | 1                  |
| 2941   | Vit fisk kokt                                     | White fish boiled                                                        | Fisk färsk fryst kokt              | Fish fresh frozen cooked  | 1                  |
| 2944   | Övrig fisk kokt                                   | Other fish boiled                                                        | Fisk färsk fryst kokt              | Fish fresh frozen cooked  | 1                  |
| 5751   | Skaldjur ospec                                    | Shellfish unspec.                                                        | Fisk o skaldjur                    | Fish and shellfish        | 1                  |
| 5746   | Tonfisk konserv                                   | Tuna canned                                                              | Fisk o skaldjur                    | Fish and shellfish        | 1                  |
| 1306   | Fisk friterad                                     | Fish fritters or deep fried fish                                         | Fisk o skaldjursprodukter o rätter | Fish and shellfish dishes | 1                  |
| 1371   | Fisk m mandel o ströbröd fryst                    | Fish w/ almonds bread crumbs frozen                                      | Fisk o skaldjursprodukter o rätter | Fish and shellfish dishes | 1                  |
| 2948   | Fisk och skaldjursgryta                           | Fish and shellfish casserole                                             | Fisk o skaldjursprodukter o rätter | Fish and shellfish dishes | 1                  |
| 1345   | Fiskbullar m hummersås konserv tillagad           | Fish balls w/ lobster sauce canned prepared                              | Fisk o skaldjursprodukter o rätter | Fish and shellfish dishes | 1                  |
| 1351   | Fiskbullar panerade stekta                        | Fish balls canned breaded fried                                          | Fisk o skaldjursprodukter o rätter | Fish and shellfish dishes | 1                  |
| 5502   | Fiskgratäng                                       | Fish gratin                                                              | Fisk o skaldjursprodukter o rätter | Fish and shellfish dishes | 1                  |
| 1358   | Fiskgratäng m dillsås                             | Fish au gratin w/ dill sauce mashed potatoes                             | Fisk o skaldjursprodukter o rätter | Fish and shellfish dishes | 1                  |
| 1372   | Fiskgratäng m potatismos o dillsås fryst tillagad | Fish au gratin w/ mashed potatoes dill sauce frozen prepared             | Fisk o skaldjursprodukter o rätter | Fish and shellfish dishes | 1                  |
| 1415   | Fiskpastej                                        | Fish paste/paté                                                          | Fisk o skaldjursprodukter o rätter | Fish and shellfish dishes | 1                  |

<sup>a</sup> Foods in validation study and main survey Riksmaten ungdom 2016-17 = 1; Foods in main survey, only = 2; Foods in validation study, only = 3

| Number | Food item (Swedish)                       | Food item                                                                                 | Main food group (Swedish)          | Main food group           | Study <sup>a</sup> |
|--------|-------------------------------------------|-------------------------------------------------------------------------------------------|------------------------------------|---------------------------|--------------------|
| 1356   | Fiskpaté m räkor                          | Fish paté w/ shellfish                                                                    | Fisk o skaldjursprodukter o rätter | Fish and shellfish dishes | 1                  |
| 1294   | Fiskpinnar stekta                         | Fish fingers breaded, fried                                                               | Fisk o skaldjursprodukter o rätter | Fish and shellfish dishes | 1                  |
| 1406   | Friterade räkor restaurang                | Shrimps deep fried restaurant                                                             | Fisk o skaldjursprodukter o rätter | Fish and shellfish dishes | 1                  |
| 3037   | Gubbröra                                  | Mix of egg, anchovy, red onion, creme fraiche, mayonnaise (individual recipes may differ) | Fisk o skaldjursprodukter o rätter | Fish and shellfish dishes | 1                  |
| 3500   | Inlagd sill                               | Pickled herring                                                                           | Fisk o skaldjursprodukter o rätter | Fish and shellfish dishes | 1                  |
| 3035   | Inlagd sill m gräddfilssås                | Pickled herring w/ sour cream                                                             | Fisk o skaldjursprodukter o rätter | Fish and shellfish dishes | 1                  |
| 3034   | Inlagd sill med tomatsås                  | Pickled herring w/ tomato sauce                                                           | Fisk o skaldjursprodukter o rätter | Fish and shellfish dishes | 1                  |
| 5880   | Krustader fyllda skagenröra svampstuvning | Croustades filled w/ mushroom stew or skagen mixture                                      | Fisk o skaldjursprodukter o rätter | Fish and shellfish dishes | 1                  |
| 258    | Laxpudding                                | Cured salmon and potatoes baked in eggs                                                   | Fisk o skaldjursprodukter o rätter | Fish and shellfish dishes | 1                  |
| 1296   | Makrillfilé konserv i tomatsås            | Mackerel fillets canned in tomato sauce                                                   | Fisk o skaldjursprodukter o rätter | Fish and shellfish dishes | 1                  |
| 3966   | Plattfisk panerad stekt                   | Flatfish breaded pan-fried                                                                | Fisk o skaldjursprodukter o rätter | Fish and shellfish dishes | 1                  |
| 1411   | Räkstuvning                               | Shrimps in thick white sauce                                                              | Fisk o skaldjursprodukter o rätter | Fish and shellfish dishes | 1                  |
| 1299   | Salt sill panerad stekt hemlagad          | Herring salted coated fried home-made                                                     | Fisk o skaldjursprodukter o rätter | Fish and shellfish dishes | 1                  |
| 1272   | Sardiner i tomatsås konserv               | Sardines canned in tomato sauce                                                           | Fisk o skaldjursprodukter o rätter | Fish and shellfish dishes | 1                  |
| 4610   | Senapssill u sås                          | Pickled herring mustard sauce drained                                                     | Fisk o skaldjursprodukter o rätter | Fish and shellfish dishes | 1                  |
| 1328   | Sill panerad stekt                        | Herring breaded fried                                                                     | Fisk o skaldjursprodukter o rätter | Fish and shellfish dishes | 1                  |
| 259    | Sillpudding                               | Salted herring and potatoes baked in eggs                                                 | Fisk o skaldjursprodukter o rätter | Fish and shellfish dishes | 1                  |
| 1297   | Surströmming                              | Baltic herring fermented                                                                  | Fisk o skaldjursprodukter o rätter | Fish and shellfish dishes | 1                  |
| 1368   | Sushi olika sorter                        | Sushi diff. kinds                                                                         | Fisk o skaldjursprodukter o rätter | Fish and shellfish dishes | 1                  |
| 3896   | Tonfisk och tomatsås                      | Tuna and tomato sauce                                                                     | Fisk o skaldjursprodukter o rätter | Fish and shellfish dishes | 1                  |
| 2943   | Vit fisk panerad och stekt                | White fish breaded and pan-fried                                                          | Fisk o skaldjursprodukter o rätter | Fish and shellfish dishes | 1                  |
| 5789   | Lax kallrökt el gravad                    | Salmon cold smoked or dry salted                                                          | Fisk rökt                          | Fish smoked               | 1                  |
| 1288   | Lax urtagen varmrökt                      | Salmon drawn smoked                                                                       | Fisk rökt                          | Fish smoked               | 1                  |
| 1316   | Lax stekt                                 | Salmon fried                                                                              | Fisk stekt ej panerad              | Fish fried                | 1                  |
| 1333   | Strömming filé stekt                      | Baltic herring fried                                                                      | Fisk stekt ej panerad              | Fish fried                | 1                  |
| 1303   | Ål ugnstekt hemlagad                      | Eel baked home-made                                                                       | Fisk stekt ej panerad              | Fish fried                | 1                  |
| 5592   | Flingor fiber                             | Breakfast cereals bran flakes                                                             | Flingor - frukostflingor           | Breakfast cereals         | 1                  |
| 5589   | Flingor kuddar                            | Breakfast cereals squares                                                                 | Flingor - frukostflingor           | Breakfast cereals         | 1                  |
| 5593   | Flingor majs                              | Breakfast cereals corn flakes                                                             | Flingor - frukostflingor           | Breakfast cereals         | 1                  |
| 5586   | Flingor ringar                            | Breakfast cereals rings                                                                   | Flingor - frukostflingor           | Breakfast cereals         | 1                  |
| 5594   | Flingor ris                               | Breakfast cereals Special K                                                               | Flingor - frukostflingor           | Breakfast cereals         | 1                  |
| 727    | Frukostflingor berik Frosties             | Breakfast cereal fortified Frosties                                                       | Flingor - frukostflingor           | Breakfast cereals         | 1                  |
| 726    | Frukostflingor berik Kalaspuffar          | Breakfast cereal fortified Kalaspuffar                                                    | Flingor - frukostflingor           | Breakfast cereals         | 1                  |
| 713    | Frukostflingor berik Rice Krispies        | Breakfast cereal fortified Rice Krispies                                                  | Flingor - frukostflingor           | Breakfast cereals         | 1                  |
| 716    | Frukostflingor ris socker kakao Coco Pops | Breakfast cereal rice sugar cocoa powder fortified Coco Pops                              | Flingor - frukostflingor           | Breakfast cereals         | 1                  |
| 5585   | Granola start                             | Granola start                                                                             | Flingor - frukostflingor           | Breakfast cereals         | 1                  |
| 5584   | Müsli                                     | Muesli                                                                                    | Flingor - frukostflingor           | Breakfast cereals         | 1                  |

<sup>a</sup> Foods in validation study and main survey Riksmaten ungdom 2016-17 = 1; Foods in main survey, only = 2; Foods in validation study, only = 3

| Number | Food item (Swedish)                                     | Food item                                            | Main food group (Swedish)  | Main food group              | Study <sup>a</sup> |
|--------|---------------------------------------------------------|------------------------------------------------------|----------------------------|------------------------------|--------------------|
| 2470   | Flytande margarin fett 80% berikad typ Mjuka<br>Milda   | Margarine liquid fat 80% fortified Milda             | Flytande matfettsblandning | Fat of mixed origin >=80%fat | 1                  |
| 2730   | Smör- & rapsolja                                        | Butter and rapeseed oil liquid                       | Flytande matfettsblandning | Fat of mixed origin >=80%fat | 1                  |
| 550    | Ananas                                                  | Pineapple                                            | Frukt färsk fryst          | Fruit fresh frozen           | 1                  |
| 551    | Apelsin                                                 | Orange                                               | Frukt färsk fryst          | Fruit fresh frozen           | 1                  |
| 552    | Aprikos                                                 | Apricot                                              | Frukt färsk fryst          | Fruit fresh frozen           | 1                  |
| 553    | Banan                                                   | Banana                                               | Frukt färsk fryst          | Fruit fresh frozen           | 1                  |
| 559    | Citron                                                  | Lemon                                                | Frukt färsk fryst          | Fruit fresh frozen           | 1                  |
| 596    | Citrusfrukter                                           | Citrus fruits                                        | Frukt färsk fryst          | Fruit fresh frozen           | 1                  |
| 2571   | Exotisk frukt                                           | Exotic fruit                                         | Frukt färsk fryst          | Fruit fresh frozen           | 1                  |
| 561    | Fikon                                                   | Figs                                                 | Frukt färsk fryst          | Fruit fresh frozen           | 1                  |
| 595    | Frukt färsk                                             | Fruit fresh                                          | Frukt färsk fryst          | Fruit fresh frozen           | 1                  |
| 638    | Fruktsallad                                             | Fruit salad                                          | Frukt färsk fryst          | Fruit fresh frozen           | 1                  |
| 520    | Granatäpple                                             | Pomegranate                                          | Frukt färsk fryst          | Fruit fresh frozen           | 1                  |
| 521    | Grapefrukt                                              | Grapefruit                                           | Frukt färsk fryst          | Fruit fresh frozen           | 1                  |
| 565    | Kiwi grön                                               | Kiwi fruit green                                     | Frukt färsk fryst          | Fruit fresh frozen           | 1                  |
| 572    | Lime                                                    | Lime                                                 | Frukt färsk fryst          | Fruit fresh frozen           | 1                  |
| 574    | Mango                                                   | Mango                                                | Frukt färsk fryst          | Fruit fresh frozen           | 1                  |
| 2593   | Matbanan, friterad eller stekt                          | Plantains fried or deep fried                        | Frukt färsk fryst          | Fruit fresh frozen           | 1                  |
| 5739   | Melon                                                   | Melon                                                | Frukt färsk fryst          | Fruit fresh frozen           | 1                  |
| 579    | Passionsfrukt                                           | Passion fruit                                        | Frukt färsk fryst          | Fruit fresh frozen           | 1                  |
| 580    | Persika nektarin                                        | Peach                                                | Frukt färsk fryst          | Fruit fresh frozen           | 1                  |
| 582    | Plommon                                                 | Plums                                                | Frukt färsk fryst          | Fruit fresh frozen           | 1                  |
| 583    | Päron                                                   | Pear                                                 | Frukt färsk fryst          | Fruit fresh frozen           | 1                  |
| 581    | Sharon                                                  | Sharon                                               | Frukt färsk fryst          | Fruit fresh frozen           | 1                  |
| 3855   | Smoothie frukt och bär utan mjölk                       | Smoothie w/ fruits and berries                       | Frukt färsk fryst          | Fruit fresh frozen           | 1                  |
| 560    | Småcitrus clementiner mandariner tangeriner<br>satsumas | Small citrus fruit clementines mandarins<br>satsumas | Frukt färsk fryst          | Fruit fresh frozen           | 1                  |
| 571    | Sötkörbär                                               | Sweet cherries                                       | Frukt färsk fryst          | Fruit fresh frozen           | 1                  |
| 587    | Vindruvor                                               | Grapes                                               | Frukt färsk fryst          | Fruit fresh frozen           | 1                  |
| 588    | Äpple m skal                                            | Apple w/ skin                                        | Frukt färsk fryst          | Fruit fresh frozen           | 1                  |
| 614    | Ananas konserv m juice                                  | Pineapple canned in juice                            | Frukt o bär konserverade   | Fruit and berries preserved  | 1                  |
| 636    | Frukt konserverad                                       | Fruits canned                                        | Frukt o bär konserverade   | Fruit and berries preserved  | 1                  |
| 599    | Aprikoser torkade                                       | Apricots dried                                       | Frukt o bär torkade        | Fruit and berries dried      | 1                  |
| 603    | Dadlar torkade                                          | Dates dried                                          | Frukt o bär torkade        | Fruit and berries dried      | 1                  |
| 604    | Fikon torkade                                           | Figs dried                                           | Frukt o bär torkade        | Fruit and berries dried      | 1                  |
| 4026   | Frukt torkad och sötad                                  | Fruit dried and sweetened                            | Frukt o bär torkade        | Fruit and berries dried      | 1                  |
| 605    | Katrinplommon 32,5 % vatten                             | Prunes 32.5% moisture                                | Frukt o bär torkade        | Fruit and berries dried      | 1                  |
| 610    | Russin                                                  | Raisins                                              | Frukt o bär torkade        | Fruit and berries dried      | 1                  |
| 4049   | Tranbär torkade                                         | Cranberries dried                                    | Frukt o bär torkade        | Fruit and berries dried      | 1                  |

<sup>a</sup> Foods in validation study and main survey Riksmaten ungdom 2016-17 = 1; Foods in main survey, only = 2; Foods in validation study, only = 3

| Number | Food item (Swedish)                            | Food item                                                       | Main food group (Swedish)   | Main food group             | Study <sup>a</sup> |
|--------|------------------------------------------------|-----------------------------------------------------------------|-----------------------------|-----------------------------|--------------------|
| 1881   | Energibar choklad nötter Start                 | Energy bar chocolate nuts Start                                 | Frukt o nötblandningar bars | Fruit and nuts mixes bars   | 1                  |
| 3059   | Sesamkakor sesamkex                            | Sesame biscuits                                                 | Frukt o nötblandningar bars | Fruit and nuts mixes bars   | 1                  |
| 643    | Apelsinjuice drickf                            | Orange juice RTD                                                | Fruktjuice mm               | Fruit juices etc            | 1                  |
| 645    | Citronjuice färskpressad                       | Lemon juice fresh                                               | Fruktjuice mm               | Fruit juices etc            | 1                  |
| 649    | Grapefruktjuice färskpressad                   | Grapefruit juice fresh                                          | Fruktjuice mm               | Fruit juices etc            | 1                  |
| 662    | Juice ospec                                    | Juice unspec.                                                   | Fruktjuice mm               | Fruit juices etc            | 1                  |
| 652    | Limejuice färskpressad                         | Lime juice fresh                                                | Fruktjuice mm               | Fruit juices etc            | 1                  |
| 5859   | Tropisk juice drickf                           | Tropical juice RTD                                              | Fruktjuice mm               | Fruit juices etc            | 1                  |
| 659    | Äppeljuice drickf                              | Apple juice RTD                                                 | Fruktjuice mm               | Fruit juices etc            | 1                  |
| 1152   | Anka                                           | Duck roasted                                                    | Fågel                       | Poultry                     | 1                  |
| 3939   | Fågel vildfågel stekt                          | Game bird boiled                                                | Fågel                       | Poultry                     | 1                  |
| 1191   | Kalkon rökt                                    | Smoked turkey                                                   | Fågel                       | Poultry                     | 1                  |
| 1190   | Kyckling kött kokt stekt grillad ospec         | Chicken hen boiled grilled fried                                | Fågel                       | Poultry                     | 1                  |
| 5902   | Fajitas kyckling                               | Fajitas chicken                                                 | Fågelprodukter fågelrätter  | Poultry products and dishes | 1                  |
| 2096   | Flygande Jakob Kyckling bacon jordnötter banan | Chicken au gratin w/ bananas bacon and peanuts (Flygande Jacob) | Fågelprodukter fågelrätter  | Poultry products and dishes | 1                  |
| 1207   | Kyckling friterad Chicken McNuggets            | Chicken deep-fried Chicken McNuggets                            | Fågelprodukter fågelrätter  | Poultry products and dishes | 1                  |
| 5875   | Kyckling m marinad tillagad typ Pulled chicken | Pulled chicken roasted                                          | Fågelprodukter fågelrätter  | Poultry products and dishes | 1                  |
| 5509   | Kyckling Marengo                               | Chicken stew w/ tomato                                          | Fågelprodukter fågelrätter  | Poultry products and dishes | 1                  |
| 5932   | Quesadillas                                    | Quesadillas                                                     | Fågelprodukter fågelrätter  | Poultry products and dishes | 1                  |
| 5694   | Cottage cheese mellanmål typ Keso              | Cottage cheese w/ fruits and nuts                               | Färskost o kvarg            | Fresh cheese and quark      | 1                  |
| 5692   | Cottage cheese naturell typ Keso               | Cottage cheese plain                                            | Färskost o kvarg            | Fresh cheese and quark      | 1                  |
| 5693   | Cottage cheese smaksatt typ Keso               | Cottage cheese flavoured                                        | Färskost o kvarg            | Fresh cheese and quark      | 1                  |
| 5697   | Drickkvarg                                     | Drinking quark                                                  | Färskost o kvarg            | Fresh cheese and quark      | 1                  |
| 99     | Fetaost fett 25%                               | Feta cheese 25% fat                                             | Färskost o kvarg            | Fresh cheese and quark      | 1                  |
| 109    | Färskost extra light fett 5% typ Philadelphia  | Cream cheese extra lgt 5% fat Philadelphia                      | Färskost o kvarg            | Fresh cheese and quark      | 1                  |
| 107    | Färskost fett 27% typ Philadelphia             | Cream cheese fat 27% Philadelphia                               | Färskost o kvarg            | Fresh cheese and quark      | 1                  |
| 5695   | Kvarg naturell                                 | Quark plain                                                     | Färskost o kvarg            | Fresh cheese and quark      | 1                  |
| 5696   | Kvarg smaksatt                                 | Quark flavoured                                                 | Färskost o kvarg            | Fresh cheese and quark      | 1                  |
| 2255   | Mozzarella ost fett 16 %                       | Mozzarella cheese fat 20%                                       | Färskost o kvarg            | Fresh cheese and quark      | 1                  |
| 5569   | Glass Ben och Jerrys                           | Ice cream Ben & Jerrys                                          | Glass                       | Ice cream                   | 1                  |
| 3127   | Glass grädd                                    | Ice cream mix                                                   | Glass                       | Ice cream                   | 1                  |
| 3128   | Glass i bägare                                 | Ice cream in cup                                                | Glass                       | Ice cream                   | 1                  |
| 1695   | Glass m chokladkex GB Sandwich                 | Ice cream in chocolate wafers GB Sandwich                       | Glass                       | Ice cream                   | 1                  |
| 5560   | Glass mjölkfri                                 | Milk free Ice Cream                                             | Glass                       | Ice cream                   | 1                  |
| 5557   | Glass yoghurtglass                             | Ice cream yoghurt ice cream                                     | Glass                       | Ice cream                   | 1                  |

<sup>a</sup> Foods in validation study and main survey Riksmaten ungdom 2016-17 = 1; Foods in main survey, only = 2; Foods in validation study, only = 3

| Number | Food item (Swedish)                      | Food item                                             | Main food group (Swedish)    | Main food group               | Study <sup>a</sup> |
|--------|------------------------------------------|-------------------------------------------------------|------------------------------|-------------------------------|--------------------|
| 3129   | Glassbars                                | Ice cream bars                                        | Glass                        | Ice cream                     | 1                  |
| 5553   | Glasspinne liten                         | Ice lolly small                                       | Glass                        | Ice cream                     | 1                  |
| 5554   | Glasspinne stor                          | Ice lolly big                                         | Glass                        | Ice cream                     | 1                  |
| 5561   | Glasstrut kulglass                       | Ice cream cone                                        | Glass                        | Ice cream                     | 1                  |
| 5556   | Glasstrut liten                          | Ice cream cone small                                  | Glass                        | Ice cream                     | 1                  |
| 5555   | Glasstrut stor                           | Ice cream cone big                                    | Glass                        | Ice cream                     | 1                  |
| 1705   | Glasstårta fett 17% typ Vienetta         | Ice cream cake fat 17%                                | Glass                        | Ice cream                     | 1                  |
| 5852   | Glasstårta rund                          | Ice cream cake round                                  | Glass                        | Ice cream                     | 1                  |
| 5570   | Isglass ospec                            | Ice lolly unspec.                                     | Glass                        | Ice cream                     | 1                  |
| 1703   | Mjukglass bägare                         | Soft ice cream vanilla                                | Glass                        | Ice cream                     | 1                  |
| 3130   | Mjukglass i strut                        | Soft ice cream in cone                                | Glass                        | Ice cream                     | 1                  |
| 1844   | Sorbet                                   | Sorbet                                                | Glass                        | Ice cream                     | 1                  |
| 2964   | Godisremmar                              | Candy straps cane                                     | Godis ej choklad             | Sweets excluding chocolate    | 1                  |
| 2963   | Klubba                                   | Lollipop                                              | Godis ej choklad             | Sweets excluding chocolate    | 1                  |
| 5604   | Tablettask                               | Bulk confectionary in small box                       | Godis ej choklad             | Sweets excluding chocolate    | 1                  |
| 1876   | Kexchoklad                               | Chocolate bar filled wafers covered w/ milk chocolate | Godis som innehåller choklad | Sweets miscellaneous          | 1                  |
| 5601   | Lösgodis påsgodis                        | Bulk confectionary                                    | Godis som innehåller choklad | Sweets miscellaneous          | 1                  |
| 2072   | Müslibar berikad typ Special K Chocolate | Cereal bar enriched e.g. Special K Bar Chocolate      | Godis som innehåller choklad | Sweets miscellaneous          | 1                  |
| 5606   | Naturgodis                               | Nature candy                                          | Godis som innehåller choklad | Sweets miscellaneous          | 1                  |
| 1860   | Nöt- och chokladkräm Nutella             | Chocolate hazelnut spread Nutella                     | Godis som innehåller choklad | Sweets miscellaneous          | 1                  |
| 5763   | Crème fraiche                            | Crème fraiche                                         | Grädde crème fraiche         | Crème, crème fraiche          | 1                  |
| 1713   | Gräddfil fett 12%                        | Sour cream fat 12%                                    | Grädde crème fraiche         | Crème, crème fraiche          | 1                  |
| 5777   | Matlagningsbas soja havre                | Alternative cream from oats or soy beans              | Grädde crème fraiche         | Crème, crème fraiche          | 1                  |
| 1717   | Matlagningsgrädde fett 15%               | Cooking cream fat 15%                                 | Grädde crème fraiche         | Crème, crème fraiche          | 1                  |
| 1715   | Vispgrädde fett 40%                      | Whipped cream fat 40%                                 | Grädde crème fraiche         | Crème, crème fraiche          | 1                  |
| 470    | Aubergine stekt                          | Aubergine fried                                       | Grönsaker                    | Vegetables excluding potatoes | 1                  |
| 320    | Avokado                                  | Avocado                                               | Grönsaker                    | Vegetables excluding potatoes | 1                  |
| 322    | Blomkål                                  | Cauliflower                                           | Grönsaker                    | Vegetables excluding potatoes | 1                  |
| 2605   | Blomkål stekt eller wokad                | Cauliflower pan-fried or stir-fried                   | Grönsaker                    | Vegetables excluding potatoes | 1                  |
| 4939   | Broccoli kokt                            | Broccoli boiled                                       | Grönsaker                    | Vegetables excluding potatoes | 1                  |
| 4196   | Brysselkål stekt eller wokad             | Brussels sprouts fried or wokad                       | Grönsaker                    | Vegetables excluding potatoes | 1                  |

<sup>a</sup> Foods in validation study and main survey Riksmaten ungdom 2016-17 = 1; Foods in main survey, only = 2; Foods in validation study, only = 3

| Number | Food item (Swedish)                       | Food item                                                      | Main food group (Swedish) | Main food group               | Study <sup>a</sup> |
|--------|-------------------------------------------|----------------------------------------------------------------|---------------------------|-------------------------------|--------------------|
| 336    | Fänkål                                    | Fennel                                                         | Grönsaker                 | Vegetables excluding potatoes | 1                  |
| 2607   | Fänkål stekt eller wokad                  | Fennel pan-fried or stir-fried                                 | Grönsaker                 | Vegetables excluding potatoes | 1                  |
| 337    | Grönkål                                   | Kale                                                           | Grönsaker                 | Vegetables excluding potatoes | 1                  |
| 3952   | Grönsaker syltade                         | Vegetables braised                                             | Grönsaker                 | Vegetables excluding potatoes | 1                  |
| 3927   | Grönsallat gurka tomat majs utan dressing | Lettuce mixed cucumber tomato corn w/ out dressing             | Grönsaker                 | Vegetables excluding potatoes | 1                  |
| 444    | Grönsallat gurka tomat paprika u dressing | Salad lettuce mix w/ cucumber tomato sweet pepper w/o dressing | Grönsaker                 | Vegetables excluding potatoes | 1                  |
| 390    | Grönsallat gurka tomat u dressing         | Lettuce mixed cucumber tomato w/o dressing                     | Grönsaker                 | Vegetables excluding potatoes | 1                  |
| 5759   | Guacamole                                 | Guacamole                                                      | Grönsaker                 | Vegetables excluding potatoes | 1                  |
| 339    | Gurka                                     | Cucumber                                                       | Grönsaker                 | Vegetables excluding potatoes | 1                  |
| 487    | Gurka inlagd                              | Cucumber pickled                                               | Grönsaker                 | Vegetables excluding potatoes | 1                  |
| 340    | Isbergssallat                             | Iceberg lettuce                                                | Grönsaker                 | Vegetables excluding potatoes | 1                  |
| 492    | Kronärtskocka kokt                        | Globe artichoke boiled                                         | Grönsaker                 | Vegetables excluding potatoes | 1                  |
| 344    | Lök gul                                   | Onions yellow                                                  | Grönsaker                 | Vegetables excluding potatoes | 1                  |
| 446    | Lök stekt                                 | Onion fried                                                    | Grönsaker                 | Vegetables excluding potatoes | 1                  |
| 400    | Majskorn konserv u lag                    | Corn kernels canned drained                                    | Grönsaker                 | Vegetables excluding potatoes | 1                  |
| 4154   | Majskorn stekta wokade                    | Corn fried                                                     | Grönsaker                 | Vegetables excluding potatoes | 1                  |
| 401    | Oliver gröna m paprikafyllning avrunna    | Olives green marinated drained                                 | Grönsaker                 | Vegetables excluding potatoes | 1                  |
| 392    | Paprika grön gul röd                      | Sweet peppers green yellow red                                 | Grönsaker                 | Vegetables excluding potatoes | 1                  |
| 2610   | Paprika stekt grillad eller wokad         | Sweet/bell pepper grilled, pan-fried or stir-fried             | Grönsaker                 | Vegetables excluding potatoes | 1                  |
| 2611   | Pumpa eller squash, stekt eller wokad     | Pumpkin or marrow pan-fried or stir-fried                      | Grönsaker                 | Vegetables excluding potatoes | 1                  |

<sup>a</sup> Foods in validation study and main survey Riksmaten ungdom 2016-17 = 1; Foods in main survey, only = 2; Foods in validation study, only = 3



| Number | Food item (Swedish)                            | Food item                                                   | Main food group (Swedish)                       | Main food group                                                 | Study <sup>a</sup> |
|--------|------------------------------------------------|-------------------------------------------------------------|-------------------------------------------------|-----------------------------------------------------------------|--------------------|
| 354    | Purjolök                                       | Leek                                                        | Grönsaker                                       | Vegetables excluding potatoes                                   | 1                  |
| 2612   | Purjolök stekt eller wokad                     | Leek pan-fried or stir-fried                                | Grönsaker                                       | Vegetables excluding potatoes                                   | 1                  |
| 355    | Rödkål                                         | Red cabbage                                                 | Grönsaker                                       | Vegetables excluding potatoes                                   | 1                  |
| 358    | Salladskål                                     | Chinese cabbage                                             | Grönsaker                                       | Vegetables excluding potatoes                                   | 1                  |
| 2639   | Sallat, olika sorter                           | Salad, various kinds                                        | Grönsaker                                       | Vegetables excluding potatoes                                   | 1                  |
| 3867   | Skott                                          | Sprouts                                                     | Grönsaker                                       | Vegetables excluding potatoes                                   | 1                  |
| 3959   | Sparris stekt eller wokad                      | Asparagus fried or wokad                                    | Grönsaker                                       | Vegetables excluding potatoes                                   | 1                  |
| 455    | Spenat fräst                                   | Spinach fried w/o browning                                  | Grönsaker                                       | Vegetables excluding potatoes                                   | 1                  |
| 5743   | Spenat Mangold                                 | Spinach Mangold                                             | Grönsaker                                       | Vegetables excluding potatoes                                   | 1                  |
| 362    | Squash                                         | Summer squash                                               | Grönsaker                                       | Vegetables excluding potatoes                                   | 1                  |
| 321    | Stjälkselleri                                  | Celery                                                      | Grönsaker                                       | Vegetables excluding potatoes                                   | 1                  |
| 406    | Surkål konserv m lag                           | Sauerkraut canned whole contents                            | Grönsaker                                       | Vegetables excluding potatoes                                   | 1                  |
| 364    | Tomat                                          | Tomato                                                      | Grönsaker                                       | Vegetables excluding potatoes                                   | 1                  |
| 4240   | Tomat stekt eller wokad                        | Tomato fried                                                | Grönsaker                                       | Vegetables excluding potatoes                                   | 1                  |
| 422    | Tomater krossade konserv m lag                 | Chopped tomatoes canned whole contents                      | Grönsaker                                       | Vegetables excluding potatoes                                   | 1                  |
| 370    | Vitkål                                         | Cabbage                                                     | Grönsaker                                       | Vegetables excluding potatoes                                   | 1                  |
| 2617   | Vitkål stekt eller wokad                       | White cabbage pan-fried or stir-fried                       | Grönsaker                                       | Vegetables excluding potatoes                                   | 1                  |
| 5744   | Örtkryddor                                     | Herbs                                                       | Grönsaker                                       | Vegetables excluding potatoes                                   | 1                  |
| 417    | Ajvar relish grönsakspasta m paprika aubergine | Ajvar relish vegetable paste w/ sweet peppers and aubergine | Grönsaks- rotfrukts- baljväxträtter o produkter | Vegetables leguminous plant root vegetables dishes and products | 1                  |

<sup>a</sup> Foods in validation study and main survey Riksmaten ungdom 2016-17 = 1; Foods in main survey, only = 2; Foods in validation study, only = 3

| Number | Food item (Swedish)             | Food item                          | Main food group (Swedish)                       | Main food group                                                 | Study <sup>a</sup> |
|--------|---------------------------------|------------------------------------|-------------------------------------------------|-----------------------------------------------------------------|--------------------|
| 2887   | Aubergineröra                   | Aubergine mix                      | Grönsaks- rotfrukts- baljväxträtter o produkter | Vegetables leguminous plant root vegetables dishes and products | 1                  |
| 488    | Bostongurka                     | Cucumber mix pickled               | Grönsaks- rotfrukts- baljväxträtter o produkter | Vegetables leguminous plant root vegetables dishes and products | 1                  |
| 3820   | Bruna bönor rullpack            | Swedish brown beans roll           | Grönsaks- rotfrukts- baljväxträtter o produkter | Vegetables leguminous plant root vegetables dishes and products | 1                  |
| 5928   | Burrito                         | Burrito                            | Grönsaks- rotfrukts- baljväxträtter o produkter | Vegetables leguminous plant root vegetables dishes and products | 1                  |
| 2662   | Bönor marinerade                | Marinated beans                    | Grönsaks- rotfrukts- baljväxträtter o produkter | Vegetables leguminous plant root vegetables dishes and products | 1                  |
| 458    | Champinjonstuvning              | Mushrooms in thick white sauce     | Grönsaks- rotfrukts- baljväxträtter o produkter | Vegetables leguminous plant root vegetables dishes and products | 1                  |
| 2064   | Falafel kikärtskroetter frysta  | Falafel chickpea-croquettes frozen | Grönsaks- rotfrukts- baljväxträtter o produkter | Vegetables leguminous plant root vegetables dishes and products | 1                  |
| 2563   | Friterade lökringar             | Onion rings deep fried             | Grönsaks- rotfrukts- baljväxträtter o produkter | Vegetables leguminous plant root vegetables dishes and products | 1                  |
| 502    | Grönsaker blandade fermenterade | Vegetables mixed fermented         | Grönsaks- rotfrukts- baljväxträtter o produkter | Vegetables leguminous plant root vegetables dishes and products | 1                  |
| 4001   | Grönsaker ospec. friterade      | Vegetables unspec. deep fried      | Grönsaks- rotfrukts- baljväxträtter o produkter | Vegetables leguminous plant root vegetables dishes and products | 1                  |
| 476    | Grönsaker stuvade ospec.        | Vegetables in thick white sauce    | Grönsaks- rotfrukts- baljväxträtter o produkter | Vegetables leguminous plant root vegetables dishes and products | 1                  |
| 439    | Grönsaksbiff stekt              | Vegetable patties fried            | Grönsaks- rotfrukts- baljväxträtter o produkter | Vegetables leguminous plant root vegetables dishes and products | 1                  |
| 5500   | Grönsaksgratäng                 | Vegetable gratin                   | Grönsaks- rotfrukts- baljväxträtter o produkter | Vegetables leguminous plant root vegetables dishes and products | 1                  |

<sup>a</sup> Foods in validation study and main survey Riksmaten ungdom 2016-17 = 1; Foods in main survey, only = 2; Foods in validation study, only = 3

| Number | Food item (Swedish)               | Food item                                 | Main food group (Swedish)                       | Main food group                                                 | Study <sup>a</sup> |
|--------|-----------------------------------|-------------------------------------------|-------------------------------------------------|-----------------------------------------------------------------|--------------------|
| 4018   | Grönsakspaté                      | Vegetable paté                            | Grönsaks- rotfrukts- baljväxträtter o produkter | Vegetables leguminous plant root vegetables dishes and products | 1                  |
| 3051   | Hummus - kikärtsröra              | Hummus dip/spread made from chickpeas     | Grönsaks- rotfrukts- baljväxträtter o produkter | Vegetables leguminous plant root vegetables dishes and products | 1                  |
| 2701   | Kikärtor marinerade               | Marinated chickpeas                       | Grönsaks- rotfrukts- baljväxträtter o produkter | Vegetables leguminous plant root vegetables dishes and products | 1                  |
| 478    | Kikärtsgryta grönsaksgryta        | Vegetable casserole unspec.               | Grönsaks- rotfrukts- baljväxträtter o produkter | Vegetables leguminous plant root vegetables dishes and products | 1                  |
| 2700   | Linsor marinerade                 | Marinated lentils                         | Grönsaks- rotfrukts- baljväxträtter o produkter | Vegetables leguminous plant root vegetables dishes and products | 1                  |
| 2638   | Linsgryta böngryta                | Vegetarian casserole w/ beans and lentils | Grönsaks- rotfrukts- baljväxträtter o produkter | Vegetables leguminous plant root vegetables dishes and products | 1                  |
| 2083   | Ratatouille                       | Ratatouille                               | Grönsaks- rotfrukts- baljväxträtter o produkter | Vegetables leguminous plant root vegetables dishes and products | 1                  |
| 2058   | Rostad lök                        | Roasted onion                             | Grönsaks- rotfrukts- baljväxträtter o produkter | Vegetables leguminous plant root vegetables dishes and products | 1                  |
| 5510   | Rotfruktsgratäng                  | Root vegetable gratin                     | Grönsaks- rotfrukts- baljväxträtter o produkter | Vegetables leguminous plant root vegetables dishes and products | 1                  |
| 302    | Rotmos hemlagad                   | Mashed swedes and potatoes home-made      | Grönsaks- rotfrukts- baljväxträtter o produkter | Vegetables leguminous plant root vegetables dishes and products | 1                  |
| 3858   | Råkostsallad med morot vitkål etc | Vegetable salad w/ carrot cabbage etc     | Grönsaks- rotfrukts- baljväxträtter o produkter | Vegetables leguminous plant root vegetables dishes and products | 1                  |
| 453    | Rödkål tillagad                   | Cabbage red and apples fried boiled       | Grönsaks- rotfrukts- baljväxträtter o produkter | Vegetables leguminous plant root vegetables dishes and products | 1                  |
| 365    | Soltorkade tomater i olja         | Sundried tomatoes marinated in oil        | Grönsaks- rotfrukts- baljväxträtter o produkter | Vegetables leguminous plant root vegetables dishes and products | 1                  |

<sup>a</sup> Foods in validation study and main survey Riksmaten ungdom 2016-17 = 1; Foods in main survey, only = 2; Foods in validation study, only = 3

| Number | Food item (Swedish)                              | Food item                                             | Main food group (Swedish)                               | Main food group                                                 | Study <sup>a</sup> |
|--------|--------------------------------------------------|-------------------------------------------------------|---------------------------------------------------------|-----------------------------------------------------------------|--------------------|
| 824    | Vinbladsdolma m ris konserv                      | Wine leaves stuffed w/ rice canned                    | Grönsaks- rotfrukts- baljväxträtter o produkter         | Vegetables leguminous plant root vegetables dishes and products | 1                  |
| 901    | Vita bönor i tomatås konserv                     | White beans baked in tomato sauce canned              | Grönsaks- rotfrukts- baljväxträtter o produkter         | Vegetables leguminous plant root vegetables dishes and products | 1                  |
| 467    | Vitkålssallad pizzasallad                        | Cabbage salad Swedish pizza salad                     | Grönsaks- rotfrukts- baljväxträtter o produkter         | Vegetables leguminous plant root vegetables dishes and products | 1                  |
| 2718   | Vitlök marinerad                                 | Marinated garlic                                      | Grönsaks- rotfrukts- baljväxträtter o produkter         | Vegetables leguminous plant root vegetables dishes and products | 1                  |
| 3859   | Grönsaker rotfrukter stekta wokade               | Mixed vegetables and root crops fried                 | Grönsaksblandningar med rotfrukter och eller baljväxter | Vegetable mixes w root vegetables and or leguminous plants      | 1                  |
| 425    | Wokgrönsaker Classic wokade i rapsolja           | Stir-fry vegetable mix Classic wokade in rapeseed oil | Grönsaksblandningar med rotfrukter och eller baljväxter | Vege                                                            | 1                  |
| 471    | Ärtor morötter tillagade                         | Peas and carrots boiled                               | Grönsaksblandningar med rotfrukter och eller baljväxter | Vegetable mixes w root vegetables and or leguminous plants      | 1                  |
| 427    | Grönsaksjuice konserv el pastöriserad drickf     | Vegetable juice canned or pasteurised RTD             | Grönsaksjuice rotfruktsjuice                            | Vegetable juice                                                 | 1                  |
| 301    | Morotsjuice                                      | Carrot juice                                          | Grönsaksjuice rotfruktsjuice                            | Vegetable juice                                                 | 1                  |
| 408    | Tomatjuice konserv drickf                        | Tomato juice canned RTD                               | Grönsaksjuice rotfruktsjuice                            | Vegetable juice                                                 | 1                  |
| 3877   | Gröt av blandade gryn                            | Porridge multigrain                                   | Gröt                                                    | Porridge                                                        | 1                  |
| 677    | Havregrynsgröt fullkorn                          | Oatmeal porridge wholemeal                            | Gröt                                                    | Porridge                                                        | 1                  |
| 2810   | Mannafrutti                                      | Rice porridge e.g. Risifrutti Manna                   | Gröt                                                    | Porridge                                                        | 1                  |
| 682    | Mannagrynsgröt                                   | Semolina porridge                                     | Gröt                                                    | Porridge                                                        | 1                  |
| 655    | Risgrynsgröt                                     | Rice porridge                                         | Gröt                                                    | Porridge                                                        | 1                  |
| 3272   | Risifrutti original                              | Rice pudding w/ fruit sauce e.g. Risifrutti original  | Gröt                                                    | Porridge                                                        | 1                  |
| 776    | Fiskburgare McDonalds                            | Fish burger Mac Donalds                               | Hamburgare med bröd (kött, fisk, fågel, vegetarisk)     | Hamburger with bread                                            | 1                  |
| 5838   | Hamburgare big mac, whopper, frisco              | Hamburger big mac whopper frisco                      | Hamburgare med bröd (kött, fisk, fågel, vegetarisk)     | Hamburger with bread                                            | 1                  |
| 5840   | Hamburgare liten                                 | Hamburger small                                       | Hamburgare med bröd (kött, fisk, fågel, vegetarisk)     | Hamburger with bread                                            | 1                  |
| 5839   | Hamburgare stor, Big tasty, super cheese n bacon | Hamburger large big tasty super cheese n bacon        | Hamburgare med bröd (kött, fisk, fågel, vegetarisk)     | Hamburger with bread                                            | 1                  |
| 5841   | Hamburgare utan bröd                             | Hamburger w/o bread                                   | Hamburgare med bröd (kött, fisk, fågel, vegetarisk)     | Hamburger with bread                                            | 1                  |

<sup>a</sup> Foods in validation study and main survey Riksmaten ungdom 2016-17 = 1; Foods in main survey, only = 2; Foods in validation study, only = 3

| Number | Food item (Swedish)                                                | Food item                                                       | Main food group (Swedish)                           | Main food group           | Study <sup>a</sup> |
|--------|--------------------------------------------------------------------|-----------------------------------------------------------------|-----------------------------------------------------|---------------------------|--------------------|
| 775    | Kycklingburgare McDonalds                                          | Chicken burger Mac Donalds                                      | Hamburgare med bröd (kött, fisk, fågel, vegetarisk) | Hamburger with bread      | 1                  |
| 3266   | Vegetarisk burgare med bröd sallad dressing                        | Vegetarian burger w/ bread salad sauce                          | Hamburgare med bröd (kött, fisk, fågel, vegetarisk) | Hamburger with bread      | 1                  |
| 5701   | Lättmargarin fett 40-60%                                           | Margarine fat 40-60%                                            | Hård matfettsblandning                              | Mixed origin fat          | 1                  |
| 5700   | Margarin fett 60-80%                                               | Margarine fat 60-80%                                            | Hård matfettsblandning                              | Mixed origin fat          | 1                  |
| 5699   | Matfettsblandning                                                  | Butter fat 60-80 %                                              | Hård matfettsblandning                              | Mixed origin fat          | 1                  |
| 95     | Ost hårdost fett 17%                                               | Hard cheese fat 17%                                             | Hård ost mm                                         | Hard cheese               | 1                  |
| 5778   | Ost hårdost fett 27%                                               | Cheese fat 27%                                                  | Hård ost mm                                         | Hard cheese               | 1                  |
| 103    | Parmesanost hårdost fett 30%                                       | Parmesan hard cheese grated 30% fat                             | Hård ost mm                                         | Hard cheese               | 1                  |
| 1604   | Fullkornsskorpor osötade                                           | Wheat wholemeal rusks                                           | Hårt bröd                                           | Crisp bread               | 1                  |
| 3252   | Grissini                                                           | Grissini Italian breadsticks                                    | Hårt bröd                                           | Crisp bread               | 1                  |
| 5562   | Hårt bröd grovt                                                    | Crisp bread wholegrain                                          | Hårt bröd                                           | Crisp bread               | 1                  |
| 5597   | Hårt bröd tunt                                                     | Crisp bread thin                                                | Hårt bröd                                           | Crisp bread               | 1                  |
| 5598   | Hårt bröd vitt                                                     | Crisp bread white                                               | Hårt bröd                                           | Crisp bread               | 1                  |
| 215    | Hårt tunnbröd vete korn socker fiber ca 3% Wasa Tunnbröd           | Crisp bread thin wheat barley sugar fibre c 3% Wasa Tunnbröd    | Hårt bröd                                           | Crisp bread               | 1                  |
| 5794   | Inälvs- organmat ej lever"                                         | Offals                                                          | Inälvor och organ                                   | Offals                    | 1                  |
| 1484   | Lever stekt                                                        | Liver pan fried                                                 | Inälvor organ produkter o rätter                    | Offal products and dishes | 1                  |
| 1479   | Leverbiff mald lever stekt hemlagad                                | Liver patties fried home-made                                   | Inälvor organ produkter o rätter                    | Offal products and dishes | 1                  |
| 4038   | Levergryta ospec.                                                  | Liver casserole unspec.                                         | Inälvor organ produkter o rätter                    | Offal products and dishes | 1                  |
| 1541   | Pölsa värmd stekt                                                  | Hash made w/ eg barley offal heated fried                       | Inälvor organ produkter o rätter                    | Offal products and dishes | 1                  |
| 1957   | Kaffe bryggt                                                       | Coffee brewed                                                   | Kaffe                                               | Coffee infusion           | 1                  |
| 2816   | Caffè latte                                                        | Caffè latte                                                     | Kaffe te med mjölk                                  | Coffee Tea with milk      | 1                  |
| 4057   | Chai latte                                                         | Chai latte                                                      | Kaffe te med mjölk                                  | Coffee Tea with milk      | 1                  |
| 1529   | Falukorv stekt                                                     | Sausage ('Falu' sausage) pan-fried                              | Korv                                                | Sausages                  | 1                  |
| 1531   | Korv fermenterad kött 59% stekt typ isterband                      | Sausage fermented meat fried 59% e.g. Småländska isterband      | Korv                                                | Sausages                  | 1                  |
| 1491   | Korv kött 48% kokt typ fläskkorv                                   | Sausage meat 48% boiled e.g. fläskkorv                          | Korv                                                | Sausages                  | 1                  |
| 1513   | Korv kött 73% stekt typ Chorizo                                    | Sausage meat 73% fried e.g. Chorizo                             | Korv                                                | Sausages                  | 1                  |
| 1542   | Korvpålägg ospec                                                   | Sausage for sandwich unspec.                                    | Korv                                                | Sausages                  | 1                  |
| 2097   | Prinskorv stekt                                                    | Miniature frankfurter('Prince' sausage) pan-fried               | Korv                                                | Sausages                  | 1                  |
| 1498   | Påläggskorv salami fett 34-44%                                     | Salami sausage fat 33% smoked                                   | Korv                                                | Sausages                  | 1                  |
| 3740   | Varmkorv grillkorv wienerkorv av kyckling kalkon eller struts kokt | Hot dog frankfurter made of chicken turkey or ostrich boiled    | Korv                                                | Sausages                  | 1                  |
| 1535   | Varmkorv stekt                                                     | Sausage hot dog fried                                           | Korv                                                | Sausages                  | 1                  |
| 2853   | Korv Stroganoff m grädd                                            | Sausage Stroganoff w/ cooking cream                             | Korvrätter                                          | Sausage diches            | 1                  |
| 5784   | Korvgryta m korv chorizo grönsaker rotfrukter                      | Sausage casserole w/ sausage chorizo vegetables root vegetables | Korvrätter                                          | Sausage diches            | 1                  |

<sup>a</sup> Foods in validation study and main survey Riksmaten ungdom 2016-17 = 1; Foods in main survey, only = 2; Foods in validation study, only = 3

| Number | Food item (Swedish)                   | Food item                           | Main food group (Swedish)  | Main food group                    | Study <sup>a</sup> |
|--------|---------------------------------------|-------------------------------------|----------------------------|------------------------------------|--------------------|
| 3249   | Bars måltidsersättning typ Nutrilett  | Meal replacement bar e.g. Nutrilett | Kost- o näringspreparat    | Diet products, nutritional therapy | 1                  |
| 3123   | Måltidsersättning drickfärdig         | Meal replacment RTD e.g. Nutrilett  | Kost- o näringspreparat    | Diet products, nutritional therapy | 1                  |
| 3250   | Proteinbar                            | Proteinbar                          | Kost- o näringspreparat    | Diet products, nutritional therapy | 1                  |
| 3550   | Proteintillskott i pulverform Whey-80 | Protein supplement powder           | Kost- o näringspreparat    | Diet products, nutritional therapy | 1                  |
| 3563   | Återhämningsprodukt Gainer-Pro pulver | Recovery product Gainer-Pro powder  | Kost- o näringspreparat    | Diet products, nutritional therapy | 1                  |
| 2306   | Kanel                                 | Cinnamon                            | Kryddor                    | Spices                             | 1                  |
| 5798   | Biff tillagad                         | Steak pan fried                     | Kött färskt fryst tillagat | Red meat fresh frozen cooked       | 1                  |
| 4174   | Carpaccio nötkött                     | Beef carpaccio                      | Kött färskt fryst tillagat | Red meat fresh frozen cooked       | 1                  |
| 5797   | Filé tillagad                         | Loin pan fried                      | Kött färskt fryst tillagat | Red meat fresh frozen cooked       | 1                  |
| 1045   | Gris revbensspjäll ugnstekt grillat   | Spare ribs pork barbecued           | Kött färskt fryst tillagat | Red meat fresh frozen cooked       | 1                  |
| 5796   | Kotlett karré tillagad                | Chops loin collar chops pan fried   | Kött färskt fryst tillagat | Red meat fresh frozen cooked       | 1                  |
| 5799   | Kött grillat                          | Meat grilled                        | Kött färskt fryst tillagat | Red meat fresh frozen cooked       | 1                  |
| 3988   | Kött ospec. kokt                      | Meat unspec. boiled                 | Kött färskt fryst tillagat | Red meat fresh frozen cooked       | 1                  |
| 4183   | Köttfärs ospec. stekt                 | Minced meat unspec. Fried           | Kött färskt fryst tillagat | Red meat fresh frozen cooked       | 1                  |
| 2908   | Lammrevbensspjäll                     | Lamb racks                          | Kött färskt fryst tillagat | Red meat fresh frozen cooked       | 1                  |
| 2826   | Lövbiff stekt                         | Top round steak fried (thin slices) | Kött färskt fryst tillagat | Red meat fresh frozen cooked       | 1                  |
| 1017   | Nöt entrecôte stekt                   | Beef cube roll fried                | Kött färskt fryst tillagat | Red meat fresh frozen cooked       | 1                  |
| 5853   | Pulled beef                           | Pulled beef                         | Kött färskt fryst tillagat | Red meat fresh frozen cooked       | 1                  |
| 2832   | Skav stekt                            | Meat thin slices pan-fried          | Kött färskt fryst tillagat | Red meat fresh frozen cooked       | 1                  |
| 2829   | Stek tillagad                         | Roasted steak                       | Kött färskt fryst tillagat | Red meat fresh frozen cooked       | 1                  |
| 1004   | Gris bacon stekt                      | Bacon pork fried                    | Kött processat             | Processed meat                     | 1                  |

<sup>a</sup> Foods in validation study and main survey Riksmaten ungdom 2016-17 = 1; Foods in main survey, only = 2; Foods in validation study, only = 3

| Number | Food item (Swedish)                            | Food item                                    | Main food group (Swedish) | Main food group                                  | Study <sup>a</sup> |
|--------|------------------------------------------------|----------------------------------------------|---------------------------|--------------------------------------------------|--------------------|
| 1016   | Gris kassler kotlettrad rökt stekt el värmd    | Pork loin smoked fried or heated             | Kött processat            | Processed meat                                   | 1                  |
| 1020   | Gris sidfläsk rimmat stekt                     | Cured pork belly fried                       | Kött processat            | Processed meat                                   | 1                  |
| 1010   | Gris skinka fett 1-3% skivad rökt              | Smoked ham pork fat 1-3% sliced              | Kött processat            | Processed meat                                   | 1                  |
| 1008   | Gris skinka italiensk lufttorkad               | Italian prosciutto cured air-dried ham pork  | Kött processat            | Processed meat                                   | 1                  |
| 1015   | Gris skinka julskinka fett ca 4,5% rimmad kokt | Cured ham Christmas ham pork fat 4.5% boiled | Kött processat            | Processed meat                                   | 1                  |
| 998    | Häst kött hamburgerkött rökt                   | Horse meat smoked                            | Kött processat            | Processed meat                                   | 1                  |
| 3019   | Kött rökt                                      | Smoked meat                                  | Kött processat            | Processed meat                                   | 1                  |
| 1475   | Leverpastej skivbar fett 26%                   | Liver paste or paté slicable fat c 26%       | Kött processat            | Processed meat                                   | 1                  |
| 999    | Nöt saltkött rimmat kokt                       | Beef meat cured boiled                       | Kött processat            | Processed meat                                   | 1                  |
| 1002   | Ren kött torkat                                | Reindeer meat dried                          | Kött processat            | Processed meat                                   | 1                  |
| 3155   | Skinka kokt                                    | Boiled ham                                   | Kött processat            | Processed meat                                   | 1                  |
| 5809   | Köttfärsås                                     | Minced meat sauce                            | Köttprodukter köträtter   | Meat products meat dishes                        | 1                  |
| 898    | Chili con carne                                | Chilli con carne                             | Köttprodukter köträtter   | Meat products meat dishes                        | 1                  |
| 5850   | Dumplings m fläsk räkor                        | Dumplings w/ pork shrimp                     | Köttprodukter köträtter   | Meat products meat dishes                        | 1                  |
| 3606   | Fläskkött friterat                             | Pork meat fried                              | Köttprodukter köträtter   | Meat products meat dishes                        | 1                  |
| 3115   | Grillspett med kött och grönsaker              | Skewer w/ meat and vegetables                | Köttprodukter köträtter   | Meat products meat dishes                        | 1                  |
| 5847   | Gris m marinad tillagad typ Pulled pork        | Pulled pork roasted                          | Köttprodukter köträtter   | Meat products meat dishes                        | 1                  |
| 5808   | Järpar stekta                                  | Minced meat rolls pan fried                  | Köttprodukter köträtter   | Meat products meat dishes                        | 1                  |
| 2507   | Kebab special m pommes frites                  | Kebab spec. w/ french fries                  | Köttprodukter köträtter   | Meat products meat dishes                        | 1                  |
| 5810   | Kebabkött stekt                                | Döner kebab fried                            | Köttprodukter köträtter   | Meat products meat dishes                        | 1                  |
| 512    | Kålpudding                                     | Cabbage pudding                              | Köttprodukter köträtter   | Meat products meat dishes                        | 1                  |
| 5806   | Köttbullar stekta                              | Meat balls pan fried                         | Köttprodukter köträtter   | Meat products meat dishes                        | 1                  |
| 2923   | Köttfärsgratäng typ tacogratäng                | Minced meat gratin e.g. taco gratin          | Köttprodukter köträtter   | Meat products meat dishes                        | 1                  |
| 5805   | Köttfärslimpa ugsnbakad                        | Meat loaf oven baked                         | Köttprodukter köträtter   | Meat products meat dishes                        | 1                  |
| 2844   | Köttgryta nöt och gris                         | Beef stew w/ beef and pork                   | Köttprodukter köträtter   | Meat products meat dishes                        | 1                  |
| 1482   | Lantpaté                                       | Country paté                                 | Köttprodukter köträtter   | Meat products meat dishes                        | 1                  |
| 252    | Lapskojs                                       | Lobscouse corned beef and mashed potatoes    | Köttprodukter köträtter   | Meat products meat dishes                        | 1                  |
| 515    | Moussaka ugsnbakad                             | Moussaka                                     | Köttprodukter köträtter   | Meat products meat dishes                        | 1                  |
| 5929   | Nachotallrik                                   | Nacho plate                                  | Köttprodukter köträtter   | Meat products meat dishes                        | 1                  |
| 5930   | Nachotallrik stor                              | Nacho plate large                            | Köttprodukter köträtter   | Meat products meat dishes                        | 1                  |
| 1124   | Nöt färs tacokryddad stekt                     | Minced meat filling for taco shells          | Köttprodukter köträtter   | Meat products meat dishes                        | 1                  |
| 1043   | Oxrulad nöt stekt                              | Beef rolls fried                             | Köttprodukter köträtter   | Meat products meat dishes                        | 1                  |
| 5807   | Pannbiff stekt                                 | Patty pan fried                              | Köttprodukter köträtter   | Meat products meat dishes                        | 1                  |
| 1081   | Renskavsgryta                                  | Reindeer thin slices casserole               | Köttprodukter köträtter   | Meat products meat dishes                        | 1                  |
| 3993   | Råbiff                                         | Steak tartare                                | Köttprodukter köträtter   | Meat products meat dishes                        | 1                  |
| 250    | Sjömansbiff hemlagad                           | Sailor's beef home-made                      | Köttprodukter köträtter   | Meat products meat dishes                        | 1                  |
| 1066   | Wienerschnitzel gris                           | Wiener schnitzel pork                        | Köttprodukter köträtter   | Meat products meat dishes                        | 1                  |
| 1831   | Cola light                                     | Diet Cola sweetened w/ synthetic sweeteners  | Lightdrycker u energi     | Beverages without energy, light soft drinks etc. | 1                  |

<sup>a</sup> Foods in validation study and main survey Riksmaten ungdom 2016-17 = 1; Foods in main survey, only = 2; Foods in validation study, only = 3

| Number | Food item (Swedish)                            | Food item                                                | Main food group (Swedish) | Main food group                                  | Study <sup>a</sup> |
|--------|------------------------------------------------|----------------------------------------------------------|---------------------------|--------------------------------------------------|--------------------|
| 1830   | Lightläsk                                      | Carbonated soft drinks sweetened w/ synthetic sweeteners | Lightdrycker u energi     | Beverages without energy, light soft drinks etc. | 1                  |
| 1834   | Saft sötad m sötningsmedel drickf              | Cordial artificial sweetener RTD                         | Lightdrycker u energi     | Beverages without energy, light soft drinks etc. | 1                  |
| 1919   | Likör söt vol. % 24                            | Liqueur sweet vol. % 24                                  | Likör                     | Liqueur                                          | 1                  |
| 51     | Gurkmajonnäs el gurksallad gatukök             | Cucumber mayonnaise or cucumber salad fast food          | Majonnässallad röror      | Mayonnaise salad                                 | 1                  |
| 3852   | Kycklingröra                                   | Chicken in a mayonnaise/sour cream based sauce           | Majonnässallad röror      | Mayonnaise salad                                 | 1                  |
| 55     | Mimosasallad                                   | Mimosa salad w/ fruit                                    | Majonnässallad röror      | Mayonnaise salad                                 | 1                  |
| 52     | Räkmajonnäs el räksallad gatukök               | Shrimp mayonnaise or shrimp salad fast food              | Majonnässallad röror      | Mayonnaise salad                                 | 1                  |
| 3871   | Rödbetsallad                                   | Beetroot salad mayonnaise                                | Majonnässallad röror      | Mayonnaise salad                                 | 1                  |
| 2107   | Skagenröra                                     | Shellfish and mayonnaise mix                             | Majonnässallad röror      | Mayonnaise salad                                 | 1                  |
| 3053   | Tapenade olivröra                              | Tapenade                                                 | Majonnässallad röror      | Mayonnaise salad                                 | 1                  |
| 3874   | Tonfiskröra                                    | Tuna mayonnaise salad                                    | Majonnässallad röror      | Mayonnaise salad                                 | 1                  |
| 2792   | Bovete kokt med salt                           | Buckwheat w/ salt                                        | Matgryn                   | Grain bulgur, couscous                           | 1                  |
| 5733   | Bulgur kokt vanlig o fullkorn                  | Bulgur boiled regular and wholegrain                     | Matgryn                   | Grain bulgur, couscous                           | 1                  |
| 5735   | Couscous kokt                                  | Couscous boiled                                          | Matgryn                   | Grain bulgur, couscous                           | 1                  |
| 835    | Majsgryn polenta kokt                          | Corn flour polenta boiled                                | Matgryn                   | Grain bulgur, couscous                           | 1                  |
| 5734   | Matgryn kokt                                   | Grains boiled                                            | Matgryn                   | Grain bulgur, couscous                           | 1                  |
| 3518   | Quinoa röd kokt m salt                         | Quinoa red boiled w/ salt                                | Matgryn                   | Grain bulgur, couscous                           | 1                  |
| 66     | Mesost fett ca 30% berik                       | Whey cheese fat 30% fortified                            | Mesvaror                  | Whey products                                    | 1                  |
| 68     | Messmör fett 5% berik                          | Whey spread fat 5% fortified                             | Mesvaror                  | Whey products                                    | 1                  |
| 2822   | Bagels                                         | Bagel                                                    | Mjukt bröd                | Soft bread                                       | 1                  |
| 4215   | Bröd friterat typ Langos (utan fyllning)       | Bread deep fried e.g langos                              | Mjukt bröd                | Soft bread                                       | 1                  |
| 5566   | Bröd halvljust                                 | Semi whole grain bread                                   | Mjukt bröd                | Soft bread                                       | 1                  |
| 5568   | Bröd mörkt                                     | Whole grain bread                                        | Mjukt bröd                | Soft bread                                       | 1                  |
| 3791   | Bröd vitt fibrer ca 5% typ Jättefranska        | White bread fibre c 5% e.g. Jättefranska                 | Mjukt bröd                | Soft bread                                       | 1                  |
| 3247   | Brödkrutonger                                  | Croutons, plain                                          | Mjukt bröd                | Soft bread                                       | 1                  |
| 229    | Croissant fransk giffel                        | Croissant                                                | Mjukt bröd                | Soft bread                                       | 1                  |
| 3818   | Hamburgerbröd                                  | Hamburger bread                                          | Mjukt bröd                | Soft bread                                       | 1                  |
| 194    | Korvbröd                                       | Hot dog bun                                              | Mjukt bröd                | Soft bread                                       | 1                  |
| 4067   | Naan indiskt mjukt bröd                        | Indian naan bread                                        | Mjukt bröd                | Soft bread                                       | 1                  |
| 5567   | Polarbröd                                      | Tea biscuit                                              | Mjukt bröd                | Soft bread                                       | 1                  |
| 205    | Scones vitt bröd vete                          | White bread wheat scones                                 | Mjukt bröd                | Soft bread                                       | 1                  |
| 217    | Tunnbröd vitt bröd mjukt mjölk fibrer ca 4%    | Bread soft thin w/ milk fibre c 4%                       | Mjukt bröd                | Soft bread                                       | 1                  |
| 198    | Vitt bröd osötat typ italienskt fibrer ca 2,5% | White bread e.g. Italian unsweetened fibre c 2.5%        | Mjukt bröd                | Soft bread                                       | 1                  |
| 203    | Vitt bröd tortilla fibrer 4,6%                 | White bread tortilla fibre 4.6%                          | Mjukt bröd                | Soft bread                                       | 1                  |
| 193    | Vitt bröd vatten typ pitabröd fibrer ca 3,5%   | White bread e.g. pita fibre c 3.5%                       | Mjukt bröd                | Soft bread                                       | 1                  |

<sup>a</sup> Foods in validation study and main survey Riksmaten ungdom 2016-17 = 1; Foods in main survey, only = 2; Foods in validation study, only = 3



| Number | Food item (Swedish)                               | Food item                                      | Main food group (Swedish)                          | Main food group                              | Study <sup>a</sup> |
|--------|---------------------------------------------------|------------------------------------------------|----------------------------------------------------|----------------------------------------------|--------------------|
| 200    | Vitt bröd vete baguette                           | Baguette white bread wheat                     | Mjukt bröd                                         | Soft bread                                   | 1                  |
| 5737   | Havregryn                                         | Oats rolled oats                               | Mjöl stärkelse kli                                 | Flour starch bran                            | 1                  |
| 5736   | Kli                                               | Bran                                           | Mjöl stärkelse kli                                 | Flour starch bran                            | 1                  |
| 680    | Rågkross fullkorn rågflingor ångprep              | Rye crushed grains or flakes steamed wholemeal | Mjöl stärkelse kli                                 | Flour starch bran                            | 1                  |
| 708    | Vetegroddar                                       | Wheat germs                                    | Mjöl stärkelse kli                                 | Flour starch bran                            | 1                  |
| 116    | Kondenserad mjölk konserv konc sockrad fett ca 9% | Condensed milk sweetened canned fat ca 9%      | Mjöl                                               | Milk                                         | 1                  |
| 5613   | Lättmjölk                                         | Milk low-fat                                   | Mjöl                                               | Milk                                         | 1                  |
| 5614   | Mellanmjölk                                       | Milk medium-fat                                | Mjöl                                               | Milk                                         | 1                  |
| 5615   | Mjöl fett >3%                                     | Milk fat >3%                                   | Mjöl                                               | Milk                                         | 1                  |
| 5873   | Mjöldryck extra protein 0,5% fett                 | Milk w/ extra protein 0.5% fat                 | Mjöl                                               | Milk                                         | 1                  |
| 118    | Mjölpulver fett 1%                                | Skimmed milk powder fat 1%                     | Mjöl                                               | Milk                                         | 1                  |
| 5874   | Mjölshake extra protein 1,5 % fett                | Milk flavoured extra protein 1.5% fat          | Mjöl                                               | Milk                                         | 1                  |
| 5831   | Caramel frappuccino                               | Caramel frappuccino                            | Mjöldryck chokladdryck milkshake smothie m yoghurt | Cocoa milkdrink milkshake smothie w youghurt | 1                  |
| 122    | Milkshake choklad jordgubb                        | Milkshake chocolate strawberry                 | Mjöldryck chokladdryck milkshake smothie m yoghurt | Cocoa milkdrink milkshake smothie w youghurt | 1                  |
| 160    | Smoothie m bär yoghurt banan juice                | Smoothie w/ berries yoghurt banana juice       | Mjöldryck chokladdryck milkshake smothie m yoghurt | Cocoa milkdrink milkshake smothie w youghurt | 1                  |
| 157    | Varm choklad mjölk fett 1,5%                      | Cocoa w/ milk fat 1,5%                         | Mjöldryck chokladdryck milkshake smothie m yoghurt | Cocoa milkdrink milkshake smothie w youghurt | 1                  |
| 2256   | Yoghurtdryck fett 0,5 % Yoggi Yalla!              | Yoghurt drink 0.5% fat e.g. Yoggi Yalla!       | Mjöldryck chokladdryck milkshake smothie m yoghurt | Cocoa milkdrink milkshake smothie w youghurt | 1                  |
| 2733   | Grekisk eller turkisk yoghurt (10 % fett)         | Greek or Turkish yoghurt 10% fat               | Naturell fil yoghurt                               | Natural fermented products                   | 1                  |
| 5775   | Matlagningsyoghurt                                | Yoghurt for cooking                            | Naturell fil yoghurt                               | Natural fermented products                   | 1                  |
| 3064   | Brända mandlar                                    | Almonds candied                                | Nötter frön                                        | Nuts and seeds                               | 1                  |
| 3069   | Chilinötter                                       | Chili peanuts                                  | Nötter frön                                        | Nuts and seeds                               | 1                  |
| 5730   | Frön                                              | Seeds                                          | Nötter frön                                        | Nuts and seeds                               | 1                  |
| 1559   | Jordnötssmör                                      | Peanut butter                                  | Nötter frön                                        | Nuts and seeds                               | 1                  |
| 1562   | Jordnötter rostade saltade                        | Peanuts roasted salted                         | Nötter frön                                        | Nuts and seeds                               | 1                  |
| 1560   | Jordnötter torkade                                | Peanuts dried                                  | Nötter frön                                        | Nuts and seeds                               | 1                  |
| 1564   | Kokosflingor torkade                              | Shredded coconut dried                         | Nötter frön                                        | Nuts and seeds                               | 1                  |
| 5729   | Mandlar                                           | Almond                                         | Nötter frön                                        | Nuts and seeds                               | 1                  |
| 3258   | Nöt och frukt bärmix                              | Nuts and dried fruits berries                  | Nötter frön                                        | Nuts and seeds                               | 1                  |
| 3140   | Nötter blandade                                   | Mixed nuts                                     | Nötter frön                                        | Nuts and seeds                               | 1                  |
| 3139   | Nötter rostade saltade                            | Mixed nuts salted                              | Nötter frön                                        | Nuts and seeds                               | 1                  |
| 1575   | Sötmandel torkad                                  | Almonds dried                                  | Nötter frön                                        | Nuts and seeds                               | 1                  |

<sup>a</sup> Foods in validation study and main survey Riksmaten ungdom 2016-17 = 1; Foods in main survey, only = 2; Foods in validation study, only = 3

| Number | Food item (Swedish)                                 | Food item                                                                | Main food group (Swedish)      | Main food group           | Study <sup>a</sup> |
|--------|-----------------------------------------------------|--------------------------------------------------------------------------|--------------------------------|---------------------------|--------------------|
| 35     | Olivolja                                            | Olive oil                                                                | Olja                           | Vegetable oils            | 1                  |
| 2189   | Rapsolja                                            | Rapeseed oil                                                             | Olja                           | Vegetable oils            | 1                  |
| 3652   | Ost sojabaserad hårdost                             | Hard cheese soy protein                                                  | Ost med vegetabiliskt fett     | Cheese with vegetable fat | 1                  |
| 905    | Tofu sojabönsost                                    | Tofu soya bean curd                                                      | Ost med vegetabiliskt fett     | Cheese with vegetable fat | 1                  |
| 2247   | Tofutti (creamy smooth) original                    | Tofutti (creamy smooth) original                                         | Ost med vegetabiliskt fett     | Cheese with vegetable fat | 1                  |
| 110    | Camembert vitmögelost friterad                      | Camembert cheese white mould ripened deep-fried                          | Osträtter                      | Cheese dish               | 1                  |
| 2564   | Chili cheese                                        | Chili cheese                                                             | Osträtter                      | Cheese dish               | 1                  |
| 2899   | Halloumi stekt eller grillad                        | Halloumi cheese fried or grilled                                         | Osträtter                      | Cheese dish               | 1                  |
| 748    | Crêpes pannkaka tunn fylld ospec.                   | Pancake thin filled unspec.                                              | Pannkakor, våfflor, crêpes     | Panncake,                 | 1                  |
| 731    | Pannkaka tunn hemlagad                              | Pancakes thin home-made                                                  | Pannkakor, våfflor, crêpes     | Panncake,                 | 1                  |
| 5783   | Ugnspannkaka o fläskpannkaka                        | Pancake thick pancake w/ fried pork                                      | Pannkakor, våfflor, crêpes     | Panncake,                 | 1                  |
| 736    | Våfflor äggvåfflor                                  | Waffles plain or egg waffles                                             | Pannkakor, våfflor, crêpes     | Panncake,                 | 1                  |
| 5738   | Nudlar kokta                                        | Noodles boiled                                                           | Pasta                          | pasta                     | 1                  |
| 3828   | Pasta >50% fullkorn kokt m salt                     | Pasta whole grain >50% boiled w/ salt                                    | Pasta                          | pasta                     | 1                  |
| 3756   | Pasta kokt m salt                                   | Pasta boiled w/ salt                                                     | Pasta                          | pasta                     | 1                  |
| 2542   | Lasagne nötfärs eller blandfärs                     | Lasagna w/ minced beef or beef and pork mince                            | Pastarätter                    | Pasta dishes              | 1                  |
| 866    | Lasagne vegetarisk spenat chèvre                    | Lasagne veg.                                                             | Pastarätter                    | Pasta dishes              | 1                  |
| 4160   | Nudelwok med kött grönsaker                         | Stir-fried noodles w/ meat, chicken or sausage                           | Pastarätter                    | Pasta dishes              | 1                  |
| 5804   | Pasta carbonara                                     | Pasta carbonara                                                          | Pastarätter                    | Pasta dishes              | 1                  |
| 5521   | Pastagrätäng                                        | Pasta gratin                                                             | Pastarätter                    | Pasta dishes              | 1                  |
| 2696   | Pastagrätäng med ostsås och skinka                  | Pasta au gratin w/ cheese sauce and ham                                  | Pastarätter                    | Pasta dishes              | 1                  |
| 861    | Ravioli m säs fryst el konserv                      | Pasta ravioli w/ sauce frozen or canned                                  | Pastarätter                    | Pasta dishes              | 1                  |
| 853    | Stuvade makaroner                                   | Pasta macaroni in thick white sauce                                      | Pastarätter                    | Pasta dishes              | 1                  |
| 862    | Tortellini m köttfyllning                           | Tortellini w/ meat filling                                               | Pastarätter                    | Pasta dishes              | 1                  |
| 518    | Wokgrönsaker m kyckling nudlar                      | Stir fry vegetables w/ chicken noodles                                   | Pastarätter                    | Pasta dishes              | 1                  |
| 543    | Wokgrönsaker m nudlar                               | Stir fry vegetables w/ noodles                                           | Pastarätter                    | Pasta dishes              | 1                  |
| 5572   | Bagel med pålägg                                    | Bagel w/ spread                                                          | Pizza paj pirog färdig smörgås | Pizza pie pirog           | 1                  |
| 5579   | Baguette sub med pålägg                             | Baguette sub w/ spread                                                   | Pizza paj pirog färdig smörgås | Pizza pie pirog           | 1                  |
| 744    | Ciabatta med mozzarella soltorkad tomat sallad      | Ciabatta sandwich w/ mozzarella cheese sundried tomatoes and green salad | Pizza paj pirog färdig smörgås | Pizza pie pirog           | 1                  |
| 5931   | Enchiladas                                          | Enchiladas                                                               | Pizza paj pirog färdig smörgås | Pizza pie pirog           | 1                  |
| 5576   | Focaccia med pålägg                                 | Focaccia w/ spread                                                       | Pizza paj pirog färdig smörgås | Pizza pie pirog           | 1                  |
| 5573   | Fralla med pålägg                                   | French roll w/ spread                                                    | Pizza paj pirog färdig smörgås | Pizza pie pirog           | 1                  |
| 5575   | Grillad macka med pålägg                            | Grilled sandwich w/ spread                                               | Pizza paj pirog färdig smörgås | Pizza pie pirog           | 1                  |
| 3011   | Grönsakspaj                                         | Vegetable pie                                                            | Pizza paj pirog färdig smörgås | Pizza pie pirog           | 1                  |
| 2506   | Kebab m bröd sallad säs                             | Döner kebab                                                              | Pizza paj pirog färdig smörgås | Pizza pie pirog           | 1                  |
| 2062   | Knäckemacka vete olika fyllningar typ Wasa Sandwich | Wheat crisp bread sandwich average diff. fillings                        | Pizza paj pirog färdig smörgås | Pizza pie pirog           | 1                  |

<sup>a</sup> Foods in validation study and main survey Riksmaten ungdom 2016-17 = 1; Foods in main survey, only = 2; Foods in validation study, only = 3

| Number | Food item (Swedish)                                                         | Food item                                                                                               | Main food group (Swedish)      | Main food group              | Study <sup>a</sup> |
|--------|-----------------------------------------------------------------------------|---------------------------------------------------------------------------------------------------------|--------------------------------|------------------------------|--------------------|
| 793    | Matmuffins grov fullkorn m getost färöst broccoli spenat soltorkade tomater | Savory muffin coarse wholemeal flour w/ goat's or sheep's cheese broccoli spinach and sundried tomatoes | Pizza paj pirog färdig smörgås | Pizza pie pirog              | 1                  |
| 3009   | Ostpaj                                                                      | Cheese pie                                                                                              | Pizza paj pirog färdig smörgås | Pizza pie pirog              | 1                  |
| 757    | Paj kyckling bacon                                                          | Chicken pie                                                                                             | Pizza paj pirog färdig smörgås | Pizza pie pirog              | 1                  |
| 756    | Paj köttfärs                                                                | Meat pie                                                                                                | Pizza paj pirog färdig smörgås | Pizza pie pirog              | 1                  |
| 796    | Paj ost skinka                                                              | Cheese and ham pie                                                                                      | Pizza paj pirog färdig smörgås | Pizza pie pirog              | 1                  |
| 758    | Pirog m köttfärsfyllning                                                    | Pirogue filled w/ minced meat                                                                           | Pizza paj pirog färdig smörgås | Pizza pie pirog              | 1                  |
| 3683   | Pirog vegetarisk quorn el soja                                              | Vegetarian pirogue                                                                                      | Pizza paj pirog färdig smörgås | Pizza pie pirog              | 1                  |
| 788    | Pitabröd m falafel sallad sesam pepperoni                                   | Pitta bread w/ falafel green salad sesame and pepperoni                                                 | Pizza paj pirog färdig smörgås | Pizza pie pirog              | 1                  |
| 5912   | Pizza hemlagad                                                              | Pizza homemade                                                                                          | Pizza paj pirog färdig smörgås | Pizza pie pirog              | 1                  |
| 5913   | Pizza kyl/frysvara                                                          | Pizza frozen or chilled                                                                                 | Pizza paj pirog färdig smörgås | Pizza pie pirog              | 1                  |
| 799    | Pizza ospec.                                                                | Pizza unspec.                                                                                           | Pizza paj pirog färdig smörgås | Pizza pie pirog              | 1                  |
| 765    | Pizza pan pizza rökt griskött fryst värmd                                   | Pizza pan pizza smoked pork frozen heated                                                               | Pizza paj pirog färdig smörgås | Pizza pie pirog              | 1                  |
| 3063   | Pizzabullar                                                                 | Mini pizzas w/ ham cheese tomatoes and/or other fillings                                                | Pizza paj pirog färdig smörgås | Pizza pie pirog              | 1                  |
| 5578   | Sandwich med pålägg                                                         | Sandwich w/ spread                                                                                      | Pizza paj pirog färdig smörgås | Pizza pie pirog              | 1                  |
| 771    | Skaldjurspaj fryst värmd                                                    | Shellfish pie frozen heated                                                                             | Pizza paj pirog färdig smörgås | Pizza pie pirog              | 1                  |
| 4212   | Smördeg- eller filodegsinbakad ost                                          | Puff pastry or filo pastry baked cheese                                                                 | Pizza paj pirog färdig smörgås | Pizza pie pirog              | 1                  |
| 5814   | Smörgås subway                                                              | Subway sandwich                                                                                         | Pizza paj pirog färdig smörgås | Pizza pie pirog              | 1                  |
| 797    | Smörgåstårta landgång                                                       | Savory sandwich layer-cake filled w/ liver paté cottage cheese ham                                      | Pizza paj pirog färdig smörgås | Pizza pie pirog              | 1                  |
| 5574   | Toast med pålägg                                                            | Toast w/ spread                                                                                         | Pizza paj pirog färdig smörgås | Pizza pie pirog              | 1                  |
| 3680   | Vegetarisk paj med quornfärs                                                | Vegetarian pie w/ quorn                                                                                 | Pizza paj pirog färdig smörgås | Pizza pie pirog              | 1                  |
| 5577   | Wrap med pålägg                                                             | Wrap w/ spread                                                                                          | Pizza paj pirog färdig smörgås | Pizza pie pirog              | 1                  |
| 750    | Vårrulle fryst värmd                                                        | Spring roll frozen heated                                                                               | Pizza paj pirog färdig smörgås | Pizza pie pirog              | 1                  |
| 4511   | Färskpotatis kokt m salt                                                    | New potatoe boiled w/ salt                                                                              | Potatis                        | Potatoes                     | 1                  |
| 231    | Höstpatis kokt m salt                                                       | Old potato boiled w/ salt                                                                               | Potatis                        | Potatoes                     | 1                  |
| 238    | Klyftpotatis u skal ugnstek m rapsolja                                      | Potato wedges w/ skin oven-baked in rapeseed oil                                                        | Potatis                        | Potatoes                     | 1                  |
| 233    | Potatis m skal bakad u salt                                                 | Potato w/ skins unsalted baked                                                                          | Potatis                        | Potatoes                     | 1                  |
| 2652   | Potatis pressad                                                             | Pressed potatoes                                                                                        | Potatis                        | Potatoes                     | 1                  |
| 5732   | Potatis stekt och råstekt                                                   | Potato fried                                                                                            | Potatis                        | Potatoes                     | 1                  |
| 4128   | Hasselbackspotatis bakad                                                    | Potatoes ovenbaked w/ butter, salt and breadcrumbs                                                      | Potatisprodukter potatisrätter | Potatoes products and dishes | 1                  |
| 257    | Janssons frestelse                                                          | Swedish potato gratin w/ pickled sprats coffee cream and milk Jansson's temptation                      | Potatisprodukter potatisrätter | Potatoes products and dishes | 1                  |

<sup>a</sup> Foods in validation study and main survey Riksmaten ungdom 2016-17 = 1; Foods in main survey, only = 2; Foods in validation study, only = 3

| Number | Food item (Swedish)                                  | Food item                                            | Main food group (Swedish)      | Main food group              | Study <sup>a</sup> |
|--------|------------------------------------------------------|------------------------------------------------------|--------------------------------|------------------------------|--------------------|
| 251    | Kroppkakor o pitepalt                                | Potato dumplings stuffed w/ chopped pork             | Potatisprodukter potatisrätter | Potatoes products and dishes | 1                  |
| 5499   | Kycklingpytt                                         | Swedish chicken hash                                 | Potatisprodukter potatisrätter | Potatoes products and dishes | 1                  |
| 5731   | Pommes frites                                        | French fries                                         | Potatisprodukter potatisrätter | Potatoes products and dishes | 1                  |
| 273    | Potatisbullar stekta                                 | Potato patties                                       | Potatisprodukter potatisrätter | Potatoes products and dishes | 1                  |
| 2891   | Potatisgnocchi                                       | Potato gnocchi                                       | Potatisprodukter potatisrätter | Potatoes products and dishes | 1                  |
| 284    | Potatisgratäng grädd ost fryst värmd                 | Potatoes au gratin w/ cream and cheese frozen heated | Potatisprodukter potatisrätter | Potatoes products and dishes | 1                  |
| 4209   | Potatisgratäng med skinka eller annat kött           | Potatoes au gratin w/ ham or other meat              | Potatisprodukter potatisrätter | Potatoes products and dishes | 1                  |
| 282    | Potatiskroketter frysta värmda                       | Potato croquettes frozen heated                      | Potatisprodukter potatisrätter | Potatoes products and dishes | 1                  |
| 274    | Potatismos                                           | Mashed potatoes                                      | Potatisprodukter potatisrätter | Potatoes products and dishes | 1                  |
| 283    | Potatismos pulver berik tillagad                     | Mashed potatoes instant powder fortified prepared    | Potatisprodukter potatisrätter | Potatoes products and dishes | 1                  |
| 261    | Potatissallad gräddfil majonnäs                      | Potato salad w/ sour cream mayonnaise                | Potatisprodukter potatisrätter | Potatoes products and dishes | 1                  |
| 264    | Potatissallad vinägrettsås                           | Potato salad w/ vinaigrette                          | Potatisprodukter potatisrätter | Potatoes products and dishes | 1                  |
| 272    | Potatissstuvning                                     | Potatoes creamed                                     | Potatisprodukter potatisrätter | Potatoes products and dishes | 1                  |
| 249    | Pytt i panna gjutjärnsstekpanna hemlagad             | Swedish hash in cast iron frying pan home-made       | Potatisprodukter potatisrätter | Potatoes products and dishes | 1                  |
| 263    | Pytt i panna vegetarisk rotfrukt svamp               | Potatoes and vegetables fried                        | Potatisprodukter potatisrätter | Potatoes products and dishes | 1                  |
| 271    | Raggmunkar potatisplättar potatispannkakor hemlagade | Potato pancakes home-made                            | Potatisprodukter potatisrätter | Potatoes products and dishes | 1                  |
| 281    | Schweizisk potatiskaka rösti fryst värmd             | Swiss potato cake rösti frozen heated                | Potatisprodukter potatisrätter | Potatoes products and dishes | 1                  |
| 2125   | Glasnudlar kokta m salt                              | Cellophane noodles boiled w/ salt                    | Ris risnudlar                  | Rice rice noodles            | 1                  |
| 820    | Ris olika sorter kokt m salt                         | Rice diff. kinds boiled w/ salt                      | Ris risnudlar                  | Rice rice noodles            | 1                  |
| 818    | Ris vildris kokt                                     | Wild rice boiled                                     | Ris risnudlar                  | Rice rice noodles            | 1                  |
| 2517   | Råris fullkorn långkornigt kokt m salt               | Long-grain brown rice boiled                         | Ris risnudlar                  | Rice rice noodles            | 1                  |
| 5563   | Riskaka salt och smaksatt                            | Rice cake                                            | Riskakor                       | Rice cakes                   | 1                  |
| 842    | Paella                                               | Paella                                               | Risrätter                      | Rice dishes                  | 1                  |

<sup>a</sup> Foods in validation study and main survey Riksmaten ungdom 2016-17 = 1; Foods in main survey, only = 2; Foods in validation study, only = 3

| Number | Food item (Swedish)                                              | Food item                                            | Main food group (Swedish) | Main food group                             | Study <sup>a</sup> |
|--------|------------------------------------------------------------------|------------------------------------------------------|---------------------------|---------------------------------------------|--------------------|
| 2686   | Ris kokt med fräst lök och buljong, pilaffris                    | Rice w/ onion pilaff rice                            | Risrätter                 | Rice dishes                                 | 1                  |
| 2683   | Ris persiskt                                                     | Rice persian                                         | Risrätter                 | Rice dishes                                 | 1                  |
| 2687   | Risotto italiensk (med parmesanost)                              | Italian risotto w/ parmesan cheese                   | Risrätter                 | Rice dishes                                 | 1                  |
| 2685   | Rispytt med kött kyckling eller korv                             | Fried rice w/ meat chicken or sausage                | Risrätter                 | Rice dishes                                 | 1                  |
| 5802   | Kaviar på tub                                                    | Fish spawn paste spread smoked                       | Rom, kaviar               | Roe, roe spread                             | 1                  |
| 5801   | Rom fiskrom                                                      | Fish spawn                                           | Rom, kaviar               | Roe, roe spread                             | 1                  |
| 2791   | Gari (inlagd japansk ingefära)                                   | Ginger pickles                                       | Rotfrukter                | Root vegetables                             | 1                  |
| 3569   | Grönsaksblandning morötter palsternacka purjolök rotselleri kokt | Mixed vegetables carrot parsnip leek celeriac boiled | Rotfrukter                | Root vegetables                             | 1                  |
| 288    | Kålrot                                                           | Swede                                                | Rotfrukter                | Root vegetables                             | 1                  |
| 3899   | Kålrot stekt eller wokad                                         | Swede fried or wokad                                 | Rotfrukter                | Root vegetables                             | 1                  |
| 289    | Morot                                                            | Carrot                                               | Rotfrukter                | Root vegetables                             | 1                  |
| 2608   | Morot stekt eller wokad                                          | Carrot pan-fried or stir-fried                       | Rotfrukter                | Root vegetables                             | 1                  |
| 291    | Pepparrot                                                        | Horseradish                                          | Rotfrukter                | Root vegetables                             | 1                  |
| 2613   | Rotselleri stekt eller wokad                                     | Celeriac pan-fried or stir-fried                     | Rotfrukter                | Root vegetables                             | 1                  |
| 293    | Rädisa                                                           | Radish                                               | Rotfrukter                | Root vegetables                             | 1                  |
| 294    | Rödbeta                                                          | Beetroot                                             | Rotfrukter                | Root vegetables                             | 1                  |
| 319    | Rödbeta inlagd u lag                                             | Beetroots pickled drained                            | Rotfrukter                | Root vegetables                             | 1                  |
| 2614   | Rödbeta stekt eller wokad                                        | Beetroot pan-fried or stir-fried                     | Rotfrukter                | Root vegetables                             | 1                  |
| 3771   | Sötpotatis ugnstekt                                              | Sweet potato fried                                   | Rotfrukter                | Root vegetables                             | 1                  |
| 2672   | Ugnrostade grönsaker och rotfrukter                              | Vegetables and root vegetables baked                 | Rotfrukter                | Root vegetables                             | 1                  |
| 4025   | Wasabi                                                           | Wasabi                                               | Rotfrukter                | Root vegetables                             | 1                  |
| 3523   | Ciderkaraktär alkoholfri                                         | Cider non-alcoholic                                  | Saft läsk cider u alkohol | Fruit syrup soft drink, non-alcoholic cider | 1                  |
| 1829   | Coladryck                                                        | Cola drink                                           | Saft läsk cider u alkohol | Fruit syrup soft drink, non-alcoholic cider | 1                  |
| 3526   | Fruktdryck utan kolsyra typ Festis                               | Fruit syrup soft drink non-carbonated                | Saft läsk cider u alkohol | Fruit syrup soft drink, non-alcoholic cider | 1                  |
| 2303   | Ice tea drickf                                                   | Ice tea RTD                                          | Saft läsk cider u alkohol | Fruit syrup soft drink, non-alcoholic cider | 1                  |
| 1828   | Läsk m kolsyra                                                   | Soft drinks carbonated                               | Saft läsk cider u alkohol | Fruit syrup soft drink, non-alcoholic cider | 1                  |
| 1839   | Måltidsdricka äpple lingon drickf berik                          | Apple cowberry drink RTD fortified                   | Saft läsk cider u alkohol | Fruit syrup soft drink, non-alcoholic cider | 1                  |
| 1818   | Måltidsdryck drickf                                              | Cordial reduced sugar RTD                            | Saft läsk cider u alkohol | Fruit syrup soft drink, non-alcoholic cider | 1                  |
| 669    | Nektar drickf                                                    | Nectars RTD                                          | Saft läsk cider u alkohol | Fruit syrup soft drink, non-alcoholic cider | 1                  |
| 1820   | Saft drickf                                                      | Fruit syrup RTD                                      | Saft läsk cider u alkohol | Fruit syrup soft drink, non-alcoholic cider | 1                  |

<sup>a</sup> Foods in validation study and main survey Riksmaten ungdom 2016-17 = 1; Foods in main survey, only = 2; Foods in validation study, only = 3

| Number | Food item (Swedish)                    | Food item                                          | Main food group (Swedish)               | Main food group                             | Study <sup>a</sup> |
|--------|----------------------------------------|----------------------------------------------------|-----------------------------------------|---------------------------------------------|--------------------|
| 3733   | Saftglögg                              | Nectar w/ spices "gluhwein"                        | Saft läsk cider u alkohol               | Fruit syrup soft drink, non-alcoholic cider | 1                  |
| 5184   | Tranbärsdryck drickf                   | Cranberry drink RTD                                | Saft läsk cider u alkohol               | Fruit syrup soft drink, non-alcoholic cider | 1                  |
| 5716   | Bulgursallad falafel                   | Salad w/ bulgur and falafel                        | Sallad blandad mat                      | Mixed salad                                 | 1                  |
| 3099   | Bön- och kikärtssallad                 | Salad w/ beans chickpeas                           | Sallad blandad mat                      | Mixed salad                                 | 1                  |
| 513    | Caesarsallad kycklingsallad m dressing | Chicken salad w/ dressing                          | Sallad blandad mat                      | Mixed salad                                 | 1                  |
| 529    | Grekisk sallad                         | Greek sallad                                       | Sallad blandad mat                      | Mixed salad                                 | 1                  |
| 3093   | Kycklingsallad                         | Chicken salad                                      | Sallad blandad mat                      | Mixed salad                                 | 1                  |
| 3095   | Laxsallad                              | Salad w/ salmon or other fish                      | Sallad blandad mat                      | Mixed salad                                 | 1                  |
| 3097   | Ost- och skinksallad                   | Cheese and ham salad                               | Sallad blandad mat                      | Mixed salad                                 | 1                  |
| 4093   | Pastasallad med bönor kikärter         | Pasta salad w/ beans chickpeas                     | Sallad blandad mat                      | Mixed salad                                 | 1                  |
| 3092   | Pastasallad med kyckling               | Pasta salad w/ chicken                             | Sallad blandad mat                      | Mixed salad                                 | 1                  |
| 3773   | Pastasallad med lax                    | Pasta salad w/ salmon or other fish                | Sallad blandad mat                      | Mixed salad                                 | 1                  |
| 3103   | Pastasallad med ost och skinka         | Pasta salad w/ cheese and ham                      | Sallad blandad mat                      | Mixed salad                                 | 1                  |
| 3104   | Pastasallad med rostbiff               | Pasta salad w/ roast beef or other meat            | Sallad blandad mat                      | Mixed salad                                 | 1                  |
| 3110   | Pastasallad med räkor                  | Pasta salad w/ shrimps or other types of shellfish | Sallad blandad mat                      | Mixed salad                                 | 1                  |
| 3774   | Pastasallad med tonfisk                | Pasta salad w/ tuna                                | Sallad blandad mat                      | Mixed salad                                 | 1                  |
| 3098   | Rostbiffssallad                        | Roast beef salad                                   | Sallad blandad mat                      | Mixed salad                                 | 1                  |
| 3094   | Räksallad                              | Shellfish salad shrimp salad                       | Sallad blandad mat                      | Mixed salad                                 | 1                  |
| 5717   | Sallad med rödbetor och chèvre         | Salad w/ chèvre                                    | Sallad blandad mat                      | Mixed salad                                 | 1                  |
| 3060   | Tabouleh                               | Tabbouleh                                          | Sallad blandad mat                      | Mixed salad                                 | 1                  |
| 5927   | Tacosallad                             | Taco salad                                         | Sallad blandad mat                      | Mixed salad                                 | 1                  |
| 3096   | Tonfisksallad                          | Tuna salad                                         | Sallad blandad mat                      | Mixed salad                                 | 1                  |
| 1968   | Chilisås tomat                         | Tomato chili sauce                                 | Senap ketchup HP-sås soja "smaksättare" | Mustard ketchup HP sauce soja "flavouring"  | 1                  |
| 5908   | Dip till kyckling nuggets              | Dip for chicken nuggets                            | Senap ketchup HP-sås soja "smaksättare" | Mustard ketchup HP sauce soja "flavouring"  | 1                  |
| 1970   | HP-sås                                 | HP-sauce                                           | Senap ketchup HP-sås soja "smaksättare" | Mustard ketchup HP sauce soja "flavouring"  | 1                  |
| 1969   | Ketchup                                | Tomato ketchup                                     | Senap ketchup HP-sås soja "smaksättare" | Mustard ketchup HP sauce soja "flavouring"  | 1                  |
| 1972   | Senap svensk                           | Mustard Swedish                                    | Senap ketchup HP-sås soja "smaksättare" | Mustard ketchup HP sauce soja "flavouring"  | 1                  |
| 909    | Sojasås                                | Soy sauce                                          | Senap ketchup HP-sås soja "smaksättare" | Mustard ketchup HP sauce soja "flavouring"  | 1                  |
| 2007   | Sweet chilisås                         | Sweet chili sauce                                  | Senap ketchup HP-sås soja "smaksättare" | Mustard ketchup HP sauce soja "flavouring"  | 1                  |

<sup>a</sup> Foods in validation study and main survey Riksmaten ungdom 2016-17 = 1; Foods in main survey, only = 2; Foods in validation study, only = 3

| Number | Food item (Swedish)                | Food item                             | Main food group (Swedish)                          | Main food group                                 | Study <sup>a</sup> |
|--------|------------------------------------|---------------------------------------|----------------------------------------------------|-------------------------------------------------|--------------------|
| 2012   | Teriyakisås                        | Teryaki sauce Japanese                | Senap ketchup HP-sås soja "smaksättare"            | Mustard ketchup HP sauce soja "flavouring"      | 1                  |
| 1395   | Räkor                              | Shrimps raw                           | Skaldjur bläckfisk färsk fryst kokt                | Shellfish squid fresh frozen cooked             | 1                  |
| 5779   | Mjukost                            | Processed cheese                      | Smältost                                           | Processed cheese                                | 1                  |
| 3864   | Kryddsmör                          | Butter flavoured w/ garlic or parsley | Smör                                               | Butter                                          | 1                  |
| 29     | Smör fett 80 %                     | Butter 80 % fat                       | Smör                                               | Butter                                          | 1                  |
| 5564   | Kex smörgåskex litet               | Cracker small                         | Smörgåskex                                         | Salty biscuits                                  | 1                  |
| 5565   | Kex smörgåskex stort               | Cracker semi-sweet biscuit big        | Smörgåskex                                         | Salty biscuits                                  | 1                  |
| 1633   | Smörgåsrån                         | Plain wafers                          | Smörgåskex                                         | Salty biscuits                                  | 1                  |
| 1897   | Druvsocker                         | Glucose                               | Socket sirap honung                                | Sugar syrup honey                               | 1                  |
| 1896   | Honung                             | Honey                                 | Socket sirap honung                                | Sugar syrup honey                               | 1                  |
| 1894   | Ljus sirap                         | Golden syrup                          | Socket sirap honung                                | Sugar syrup honey                               | 1                  |
| 1892   | Socket                             | Sugar                                 | Socket sirap honung                                | Sugar syrup honey                               | 1                  |
| 1883   | Tabletter sockerfria               | Pastilles sugar free                  | Socketfritt godis                                  | Sweets sugar-free                               | 1                  |
| 2066   | Sojakorv                           | Soya sausage                          | Sojaprotein veteprotein Quorn produkter och rätter | Soy and wheat protein quorn products and dishes | 1                  |
| 544    | Vegetabilisk pastej typ tartex     | Vegetable paste Tartex                | Sojaprotein veteprotein Quorn produkter och rätter | Soy and wheat protein quorn products and dishes | 1                  |
| 5714   | Vegetarisk biff                    | Vegetarian beef                       | Sojaprotein veteprotein Quorn produkter och rätter | Soy and wheat protein quorn products and dishes | 1                  |
| 5709   | Vegetarisk filé bitar              | Vegetarian filet                      | Sojaprotein veteprotein Quorn produkter och rätter | Soy and wheat protein quorn products and dishes | 1                  |
| 5715   | Vegetarisk färs                    | Vegetarian minced quorn soy           | Sojaprotein veteprotein Quorn produkter och rätter | Soy and wheat protein quorn products and dishes | 1                  |
| 5712   | Vegetarisk färssås                 | Vegetarian bolognese sauce            | Sojaprotein veteprotein Quorn produkter och rätter | Soy and wheat protein quorn products and dishes | 1                  |
| 5713   | Vegetarisk gryta, quorn eller soja | Vegetarian stew                       | Sojaprotein veteprotein Quorn produkter och rätter | Soy and wheat protein quorn products and dishes | 1                  |
| 5703   | Vegetarisk lasagne                 | Vegetarian lasagne                    | Sojaprotein veteprotein Quorn produkter och rätter | Soy and wheat protein quorn products and dishes | 1                  |
| 5704   | Vegetarisk moussaka                | Vegetarian moussaka                   | Sojaprotein veteprotein Quorn produkter och rätter | Soy and wheat protein quorn products and dishes | 1                  |
| 5706   | Vegetarisk pyttipanna              | Vegetarian swedish hash               | Sojaprotein veteprotein Quorn produkter och rätter | Soy and wheat protein quorn products and dishes | 1                  |
| 5705   | Vegetarisk schnitzel               | Vegetarian schnitzel                  | Sojaprotein veteprotein Quorn produkter och rätter | Soy and wheat protein quorn products and dishes | 1                  |
| 5711   | Vegetariska bollar                 | Vegetarian balls                      | Sojaprotein veteprotein Quorn produkter och rätter | Soy and wheat protein quorn products and dishes | 1                  |

<sup>a</sup> Foods in validation study and main survey Riksmaten ungdom 2016-17 = 1; Foods in main survey, only = 2; Foods in validation study, only = 3

| Number | Food item (Swedish)                                          | Food item                                                       | Main food group (Swedish)                          | Main food group                                 | Study <sup>a</sup> |
|--------|--------------------------------------------------------------|-----------------------------------------------------------------|----------------------------------------------------|-------------------------------------------------|--------------------|
| 5710   | Vegetariska nuggets                                          | Vegetarian nuggets                                              | Sojaprotein veteprotein Quorn produkter och rätter | Soy and wheat protein quorn products and dishes | 1                  |
| 1354   | Bouillabaisse fisksoppa                                      | Fish soup                                                       | Soppa mat                                          | Soup                                            | 1                  |
| 438    | Grönsakssoppa redd ängamat                                   | Vegetable soup w/ cream                                         | Soppa mat                                          | Soup                                            | 1                  |
| 1209   | Kycklingsoppa redd pulver tillagad m vatten typ Varma koppen | Instant chicken soup cream of cooked w/ water e.g. Varma koppen | Soppa mat                                          | Soup                                            | 1                  |
| 1206   | Kycklingsoppa thailändsk                                     | Chicken soup clear                                              | Soppa mat                                          | Soup                                            | 1                  |
| 1073   | Köttssoppa nötkött                                           | Beef soup                                                       | Soppa mat                                          | Soup                                            | 1                  |
| 903    | Linsoppa                                                     | Lentil soup                                                     | Soppa mat                                          | Soup                                            | 1                  |
| 2992   | Misosoppa                                                    | Miso soup w/ tofu                                               | Soppa mat                                          | Soup                                            | 1                  |
| 873    | Nudelsoppa olika smaker kryddad                              | Instant noodles soup diff. flavours                             | Soppa mat                                          | Soup                                            | 1                  |
| 900    | Ärtsoppa m fläsk konserv tillagad m vatten                   | Pea soup w/ pork canned prepared w/ water                       | Soppa mat                                          | Soup                                            | 1                  |
| 904    | Ärtsoppa vegetarisk                                          | Pea soup veg.                                                   | Soppa mat                                          | Soup                                            | 1                  |
| 2302   | Energidryck typ Red Bull berikad                             | Energy drink e.g. Red Bull fortified                            | Sportdrycker energidrycker                         | Sports drinks, energy drinks                    | 1                  |
| 1918   | Brännvin renat el vodka vol. % 40                            | Vodka or snaps vol. % 40                                        | Starksprit                                         | Spirits                                         | 1                  |
| 333    | Champinjoner färska                                          | Mushrooms                                                       | Svamp                                              | Mushroom                                        | 1                  |
| 457    | Champinjoner stekta                                          | Mushrooms fried                                                 | Svamp                                              | Mushroom                                        | 1                  |
| 2619   | Kantareller stekta                                           | Chanterelles fried                                              | Svamp                                              | Mushroom                                        | 1                  |
| 3317   | Svamp stekt                                                  | Mushroom fried                                                  | Svamp                                              | Mushroom                                        | 1                  |
| 3557   | Chutney                                                      | Chutney                                                         | Sylt marmelad gelé äppelmos o dyl                  | Jam, marmelade, jelly, apple sauce              | 1                  |
| 1812   | Cumberlandsås                                                | Cumberland sauce                                                | Sylt marmelad gelé äppelmos o dyl                  | Jam, marmelade, jelly, apple sauce              | 1                  |
| 1798   | Lingonsylt                                                   | Cowberry/lingonberry jam                                        | Sylt marmelad gelé äppelmos o dyl                  | Jam, marmelade, jelly, apple sauce              | 1                  |
| 5552   | Marmelad                                                     | Jam orange, apricot and raspberry                               | Sylt marmelad gelé äppelmos o dyl                  | Jam, marmelade, jelly, apple sauce              | 1                  |
| 1795   | Svartvinbärsjelé                                             | Black currant jelly                                             | Sylt marmelad gelé äppelmos o dyl                  | Jam, marmelade, jelly, apple sauce              | 1                  |
| 5548   | Sylt frukt och bär                                           | Jam, strawberry, raspberry and blueberry                        | Sylt marmelad gelé äppelmos o dyl                  | Jam, marmelade, jelly, apple sauce              | 1                  |
| 1809   | Äppelmos                                                     | Apple sauce                                                     | Sylt marmelad gelé äppelmos o dyl                  | Jam, marmelade, jelly, apple sauce              | 1                  |
| 1553   | Kalvsylta                                                    | Veal brawn                                                      | Sylta                                              | Brawn                                           | 1                  |
| 3598   | Barbequesås                                                  | Barbeque sauce                                                  | Sås dressing majonnäs                              | Sauce dressing mayonnaise                       | 1                  |
| 58     | Bearnaisesås                                                 | Béarnaise sauce                                                 | Sås dressing majonnäs                              | Sauce dressing mayonnaise                       | 1                  |
| 1985   | Béchamelsås                                                  | White sauce béchamel                                            | Sås dressing majonnäs                              | Sauce dressing mayonnaise                       | 1                  |
| 1991   | Brunsås mjölk                                                | Brown sauce w/ milk                                             | Sås dressing majonnäs                              | Sauce dressing mayonnaise                       | 1                  |

<sup>a</sup> Foods in validation study and main survey Riksmaten ungdom 2016-17 = 1; Foods in main survey, only = 2; Foods in validation study, only = 3



| Number | Food item (Swedish)                                    | Food item                                                 | Main food group (Swedish)        | Main food group           | Study <sup>a</sup> |
|--------|--------------------------------------------------------|-----------------------------------------------------------|----------------------------------|---------------------------|--------------------|
| 3869   | Caesardressing                                         | Ceasar dressing                                           | Sås dressing majonnäs            | Sauce dressing mayonnaise | 1                  |
| 2104   | Carbonara sås                                          | Carbonara                                                 | Sås dressing majonnäs            | Sauce dressing mayonnaise | 1                  |
| 459    | Champinjonsås                                          | Mushrooms in white sauce                                  | Sås dressing majonnäs            | Sauce dressing mayonnaise | 1                  |
| 2075   | Coleslaw kall sås                                      | Cold sauce school coleslaw                                | Sås dressing majonnäs            | Sauce dressing mayonnaise | 1                  |
| 5906   | Dip till pommes frites bearnaise                       | Dip for french fries bearnaise                            | Sås dressing majonnäs            | Sauce dressing mayonnaise | 1                  |
| 23     | Gravlaxsås hovmästarsås                                | Sauce (mustard based) for raw spiced salmon               | Sås dressing majonnäs            | Sauce dressing mayonnaise | 1                  |
| 2973   | Hamburgerdressing                                      | Hamburger dressing                                        | Sås dressing majonnäs            | Sauce dressing mayonnaise | 1                  |
| 2073   | Jordnötssås                                            | Peanut sauce                                              | Sås dressing majonnäs            | Sauce dressing mayonnaise | 1                  |
| 21     | Majonnäs fett 90%                                      | Mayonnaise 90% fat                                        | Sås dressing majonnäs            | Sauce dressing mayonnaise | 1                  |
| 2142   | Ost- och skinksås                                      | Cheese and ham sauce                                      | Sås dressing majonnäs            | Sauce dressing mayonnaise | 1                  |
| 1989   | Ostsås ädelost                                         | Blue cheese sauce made w/ coffee cream and whipping cream | Sås dressing majonnäs            | Sauce dressing mayonnaise | 1                  |
| 3868   | Pepparrotsvisp                                         | Whipped cream w/ horseraddish                             | Sås dressing majonnäs            | Sauce dressing mayonnaise | 1                  |
| 2004   | Pestosås m basilika pinjenötter cashewnötter           | Pesto sauce w/ basil pine nuts and cashew nuts            | Sås dressing majonnäs            | Sauce dressing mayonnaise | 1                  |
| 5911   | Pizzatopping sås                                       | Pizza topping sauce                                       | Sås dressing majonnäs            | Sauce dressing mayonnaise | 1                  |
| 25     | Remouladsås                                            | Rémoulade sauce                                           | Sås dressing majonnäs            | Sauce dressing mayonnaise | 1                  |
| 60     | Rhode Island sås                                       | Rhode Island sauce                                        | Sås dressing majonnäs            | Sauce dressing mayonnaise | 1                  |
| 2969   | Skaldjurssås                                           | Shellfish sauce                                           | Sås dressing majonnäs            | Sauce dressing mayonnaise | 1                  |
| 1992   | Sky                                                    | Thin gravy                                                | Sås dressing majonnäs            | Sauce dressing mayonnaise | 1                  |
| 462    | Tomatsalsa kall                                        | Tomato sauce Mexican style                                | Sås dressing majonnäs            | Sauce dressing mayonnaise | 1                  |
| 2000   | Tomatsås                                               | Tomato sauce                                              | Sås dressing majonnäs            | Sauce dressing mayonnaise | 1                  |
| 26     | Vinägrett dressing fett 45%                            | Vinaigrette w/ water 45% fat                              | Sås dressing majonnäs            | Sauce dressing mayonnaise | 1                  |
| 3586   | Yoghurtsås                                             | Yoghurt sauce                                             | Sås dressing majonnäs            | Sauce dressing mayonnaise | 1                  |
| 2002   | Äggsås m persilja                                      | Egg sauce w/ parsley                                      | Sås dressing majonnäs            | Sauce dressing mayonnaise | 1                  |
| 1756   | Bär- fruktkrä m bär- fruktsoppa sötad m sorbitol ospec | Soup fruit berries sweetener unspec.                      | Söta soppor kräm o efterrättssås | Sweet soups sauce         | 1                  |
| 2902   | Bärsås                                                 | Berry sauce                                               | Söta soppor kräm o efterrättssås | Sweet soups sauce         | 1                  |
| 1768   | Chokladsås                                             | Chocolate sauce                                           | Söta soppor kräm o efterrättssås | Sweet soups sauce         | 1                  |
| 1749   | Fruktdryck blåbär                                      | Fruit drink blueberry                                     | Söta soppor kräm o efterrättssås | Sweet soups sauce         | 1                  |
| 1750   | Fruktsoppa ätf blandad torkad frukt pastöriserad berik | Fruit soup                                                | Söta soppor kräm o efterrättssås | Sweet soups sauce         | 1                  |
| 1769   | Kolasås                                                | Butterscotch sauce                                        | Söta soppor kräm o efterrättssås | Sweet soups sauce         | 1                  |
| 1744   | Krä m bär frukt ospec.                                 | Stewed fruit and berries                                  | Söta soppor kräm o efterrättssås | Sweet soups sauce         | 1                  |
| 1751   | Nyponsoppa ätf pastöriserad el på pulver berik         | Rosehip soup RTE pasteurised or powder prepared fortified | Söta soppor kräm o efterrättssås | Sweet soups sauce         | 1                  |
| 1748   | Saftsås                                                | Fruit syrup sauce thickened w/ potato starch              | Söta soppor kräm o efterrättssås | Sweet soups sauce         | 1                  |
| 1771   | Vaniljsås m grädde mjölk                               | Custard                                                   | Söta soppor kräm o efterrättssås | Sweet soups sauce         | 1                  |

<sup>a</sup> Foods in validation study and main survey Riksmaten ungdom 2016-17 = 1; Foods in main survey, only = 2; Foods in validation study, only = 3

| Number | Food item (Swedish)                                | Food item                                            | Main food group (Swedish)                   | Main food group                         | Study <sup>a</sup> |
|--------|----------------------------------------------------|------------------------------------------------------|---------------------------------------------|-----------------------------------------|--------------------|
| 3112   | Sötningemedel (till kaffe, te m.m.)                | Artificial sweetener                                 | Sötningemedel                               | Artificial sweetener                    | 1                  |
| 2557   | Tacoskal                                           | Taco shells                                          | Tacoskal                                    | Taco shell                              | 1                  |
| 1962   | Te bryggt                                          | Tea brewed                                           | Te                                          | Tea infusion                            | 1                  |
| 5602   | Tuggummi ospec                                     | Chewing gum unspec.                                  | Tuggummi                                    | Chewing gum                             | 1                  |
| 1953   | Kranvatten                                         | Tap water                                            | Vatten mineralvatten                        | Water, mineral water                    | 1                  |
| 1954   | Källvatten förpackat                               | Spring water packed                                  | Vatten mineralvatten                        | Water, mineral water                    | 1                  |
| 1951   | Mineralvatten                                      | Mineral water                                        | Vatten mineralvatten                        | Water, mineral water                    | 1                  |
| 5684   | Havredryck sojadryck                               | Oat milk soy milk                                    | Vegetabiliska produkter och mjölkersättning | Vegetable products and milk replacement | 1                  |
| 5690   | Havregurt Soygurt                                  | Oatgurt Soygurt milkfree yoghurt                     | Vegetabiliska produkter och mjölkersättning | Vegetable products and milk replacement | 1                  |
| 3732   | Lättglögg 2,25%                                    | Mulled wine (non-alcoholic)                          | Vin                                         | Wine                                    | 1                  |
| 4060   | Mousserande vin, champagne                         | Sparkling wine champagne                             | Vin                                         | Wine                                    | 1                  |
| 1907   | Rödvin vol. % 14                                   | Red wine vol. % 14                                   | Vin                                         | Wine                                    | 1                  |
| 1916   | Sherry halvtorr vol. % 17                          | Sherry medium dry vol. % 17                          | Vin                                         | Wine                                    | 1                  |
| 1917   | Starkvinsglögg vol. % 16                           | Fortified wine mulled vol. % 16                      | Vin                                         | Wine                                    | 1                  |
| 1912   | Vinglögg vol. % 10                                 | Wine mulled vol. % 10                                | Vin                                         | Wine                                    | 1                  |
| 1904   | Vitt vin vol. % 1                                  | White wine vol. % 1                                  | Vin                                         | Wine                                    | 1                  |
| 1908   | Vitt vin vol. % 12                                 | White wine vol. % 12                                 | Vin                                         | Wine                                    | 1                  |
| 694    | Välling för vuxna fullkorn berik                   | Gruel for adults wholemeal fortified                 | Välling                                     | Gruel                                   | 1                  |
| 2205   | Ägg konventionellt kokt                            | Boiled egg conventional                              | Ägg                                         | Egg                                     | 1                  |
| 1225   | Ägg konventionellt rått                            | Egg raw conventional                                 | Ägg                                         | Egg                                     | 1                  |
| 1233   | Ägg konventionellt stekt                           | Egg fried conventional                               | Ägg                                         | Egg                                     | 1                  |
| 1199   | Bondomelett                                        | Farmer's omelette                                    | Äggprodukter o rätter                       | Egg products and dishes                 | 1                  |
| 1230   | Fransk omelett vatten                              | French omelette w/ water                             | Äggprodukter o rätter                       | Egg products and dishes                 | 1                  |
| 2197   | Äggröra                                            | Scrambled eggs w/o flour                             | Äggprodukter o rätter                       | Egg products and dishes                 | 1                  |
| 2305   | Alkoholfri öl                                      | Non alcoholic beer                                   | Öl                                          | Beer                                    | 1                  |
| 1901   | Öl lättöl vol. % 2,3                               | Small beer or low-alcohol beer vol. % 2.3            | Öl                                          | Beer                                    | 1                  |
| 1902   | Öl pilsner vol. % 3,5                              | Beer or pilsner vol. % 3.5                           | Öl                                          | Beer                                    | 1                  |
| 1906   | Öl starköl el exportöl vol. % 5,4                  | Strong beer vol. % 5.4                               | Öl                                          | Beer                                    | 1                  |
| 3980   | Dryck med vitaminer och mineraler typ Vitamin well | Water w/ vitamins and minerals added                 | Övriga sötade drycker vattenchoklad         | Beverages miscellaneous                 | 1                  |
| 667    | Multivitamin dryck tillverkad av konc drickf       | Multi-vitamin beverage prepared from concentrate RTD | Övriga sötade drycker vattenchoklad         | Beverages miscellaneous                 | 1                  |
| 4      | Kokosfett                                          | Coconut butter                                       | Övrigt fett (ister, talg, kokosfett)        | Other fats (lard, tallow, coconut oil)  | 1                  |
| 5996   | Bönpasta                                           | Pasta made of beans                                  | Baljväxter (bönor, linser och ärter)        | Leguminous plant                        | 2                  |
| 2947   | Laxbullar laxburgare                               | Salmon fishballs, fish burger fried                  | Fisk o skaldjursprodukter o rätter          | Fish and shellfish dishes               | 2                  |
| 5993   | Flingor med röda bär                               | Cereals w/ red fruit                                 | Flingor - frukostflingor                    | Breakfast cereals                       | 2                  |
| 6013   | Kycklingryta i currysås                            | Chicken curry stew                                   | Fågelprodukter fågelrätter                  | Poultry products and dishes             | 2                  |

<sup>a</sup> Foods in validation study and main survey Riksmaten ungdom 2016-17 = 1; Foods in main survey, only = 2; Foods in validation study, only = 3

| Number | Food item (Swedish)                       | Food item                                          | Main food group (Swedish)                           | Main food group                              | Study <sup>a</sup> |
|--------|-------------------------------------------|----------------------------------------------------|-----------------------------------------------------|----------------------------------------------|--------------------|
| 2863   | Kycklinggryta med grädde/ crème fraiche   | Chicken casserole w/ cream/ crème fraiche          | Fågelprodukter fågelrätter                          | Poultry products and dishes                  | 2                  |
| 1100   | Kycklingköttbullar fett 12% stekta frysta | Chicken meat balls fat 12% fried frozen            | Fågelprodukter fågelrätter                          | Poultry products and dishes                  | 2                  |
| 6042   | Kokosvatten smaksatt el naturell          | Coconut water natural or flavoured                 | Grönsaker                                           | Vegetables excluding potatoes                | 2                  |
| 495    | Majskolv kokt                             | Corn cobs boiled                                   | Grönsaker                                           | Vegetables excluding potatoes                | 2                  |
| 1886   | Kakaopulver fett 20-22%                   | Cocoa powder fat 20-22%                            | Kakaoprodukter                                      | Cacao products                               | 2                  |
| 1517   | Salami importerad fett 45%                | Salami imported fat 45%                            | Korv                                                | Sausages                                     | 2                  |
| 6015   | Lammgryta med curry                       | Lamb curry                                         | Köttprodukter köträtter                             | Meat products meat dishes                    | 2                  |
| 114    | Filmjolk fett 3%                          | Fermented milk fat 3%                              | Naturell fil yoghurt                                | Natural fermented products                   | 2                  |
| 120    | Lättfil fett 0,5%                         | Fermented milk skimmed fat 0.5%                    | Naturell fil yoghurt                                | Natural fermented products                   | 2                  |
| 135    | Lättyoghurt naturell fett 0,5%            | Yoghurt natural skimmed fat 0.5%                   | Naturell fil yoghurt                                | Natural fermented products                   | 2                  |
| 130    | Mellanfil fett 1,5%                       | Fermented milk semi-skimmed fat 1.5%               | Naturell fil yoghurt                                | Natural fermented products                   | 2                  |
| 124    | Yoghurt naturell fett 3 %                 | Yoghurt natural fat 3%                             | Naturell fil yoghurt                                | Natural fermented products                   | 2                  |
| 144    | Filmjolk m jordgubbssmak fett 2,7%        | Fermented milk strawberry flavour 2.7% fat         | Smaksatt fil yoghurt                                | Flavoured fermented milk                     | 2                  |
| 145    | Lättfil m jordgubbssmak 0,5% fett         | Fermented milk skimmed strawberry flavour 0.5% fat | Smaksatt fil yoghurt                                | Flavoured fermented milk                     | 2                  |
| 6040   | Yoghurt smaksatt helfet                   | Yoghurt flavoured full fat                         | Smaksatt fil yoghurt                                | Flavoured fermented milk                     | 2                  |
| 6041   | Yoghurt smaksatt lätt                     | Yoghurt flavoured light                            | Smaksatt fil yoghurt                                | Flavoured fermented milk                     | 2                  |
| 5758   | Aioli                                     | Aioli mayonnaise                                   | Sås dressing majonnäs                               | Sauce dressing mayonnaise                    | 2                  |
| 2759   | Currysås kylvara                          | Curry sauce RTE refrigerated/frozen                | Sås dressing majonnäs                               | Sauce dressing mayonnaise                    | 2                  |
| 2230   | Ostsås fett 8%                            | Cheese sauce ready-made sauce fat 8%               | Sås dressing majonnäs                               | Sauce dressing mayonnaise                    | 2                  |
| 2144   | Tzatziki                                  | Tzatziki                                           | Sås dressing majonnäs                               | Sauce dressing mayonnaise                    | 2                  |
| 5994   | Vitlökssås                                | Garlic sauce                                       | Sås dressing majonnäs                               | Sauce dressing mayonnaise                    | 2                  |
| 5520   | Kycklinggryta med mango                   | Chicken stew w/ mango                              | Fågelprodukter fågelrätter                          | Poultry products and dishes                  | 3                  |
| 404    | Sparris vit konserv u lag                 | Asparagus white canned drained                     | Grönsaker                                           | Vegetables excluding potatoes                | 3                  |
| 1847   | Chokladdryck Pucko                        | Cocoa milk RTD Pucko                               | Mjölkdryck chokladdryck milkshake smothie m yoghurt | Cocoa milkdrink milkshake smothie w youghurt | 3                  |
| 5685   | Filmjolk naturell                         | Fermented milk plain                               | Naturell fil yoghurt                                | Natural fermented products                   | 3                  |

<sup>a</sup> Foods in validation study and main survey Riksmaten ungdom 2016-17 = 1; Foods in main survey, only = 2; Foods in validation study, only = 3

| Number | Food item (Swedish)  | Food item                | Main food group (Swedish)  | Main food group            | Study <sup>a</sup> |
|--------|----------------------|--------------------------|----------------------------|----------------------------|--------------------|
| 5687   | Yoghurt naturell     | Yoghurt plain            | Naturell fil yoghurt       | Natural fermented products | 3                  |
| 89     | Margarinost fett 30% | Margarine cheese fat 30% | Ost med vegetabiliskt fett | Cheese with vegetable fat  | 3                  |
| 5686   | Filmjök smaksatt     | Fermented milk flavoured | Smaksatt fil yoghurt       | Flavoured fermented milk   | 3                  |
| 5688   | Yoghurt smaksatt     | Yoghurt flavoured        | Smaksatt fil yoghurt       | Flavoured fermented milk   | 3                  |

<sup>a</sup> Foods in validation study and main survey Riksmaten ungdom 2016-17 = 1; Foods in main survey, only = 2; Foods in validation study, only = 3
