# Supplementary material for: Use of a Web-Based Dietary Assessment Tool (RiksmatenFlex) in Swedish Adolescents: Comparison and Validation Study
Source: PubMed Central journal article supplement (PMC6914230; doi:10.2196/12572), 2019-10-04

Multimedia Appendix 3. Bland-Altman plots of reported intake of energy and macronutrients between the two dietary methods.

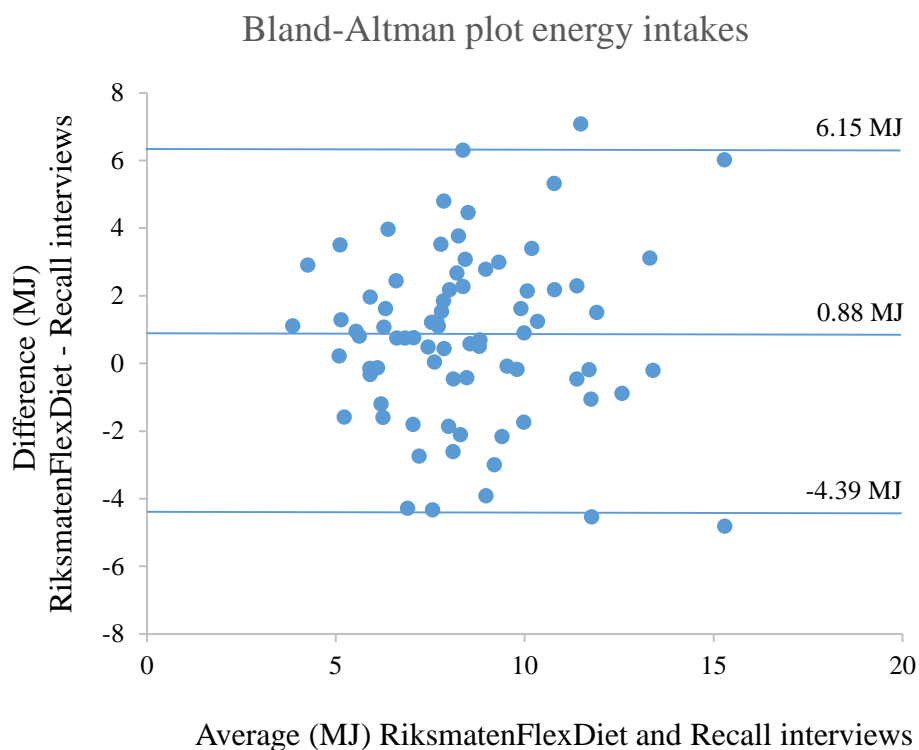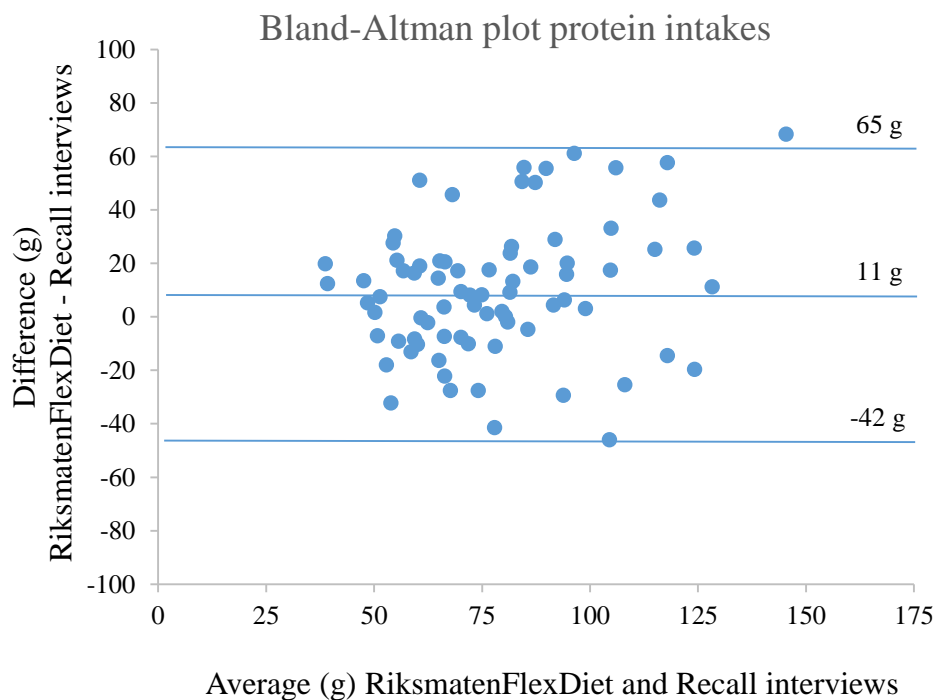

Bland-Altman plot fat intakes

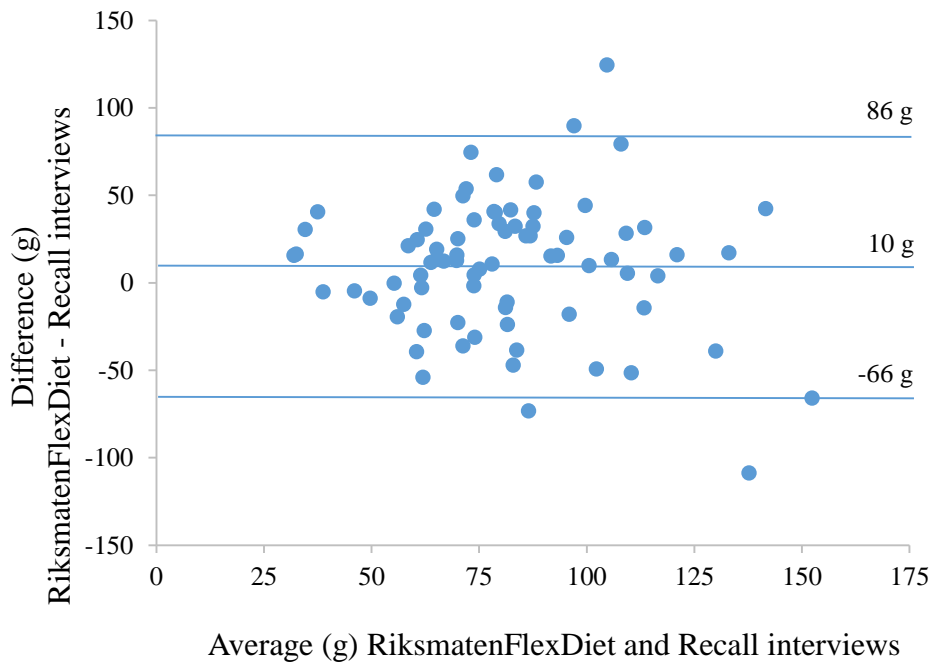

Bland-Altman plot carbohydrate intakes

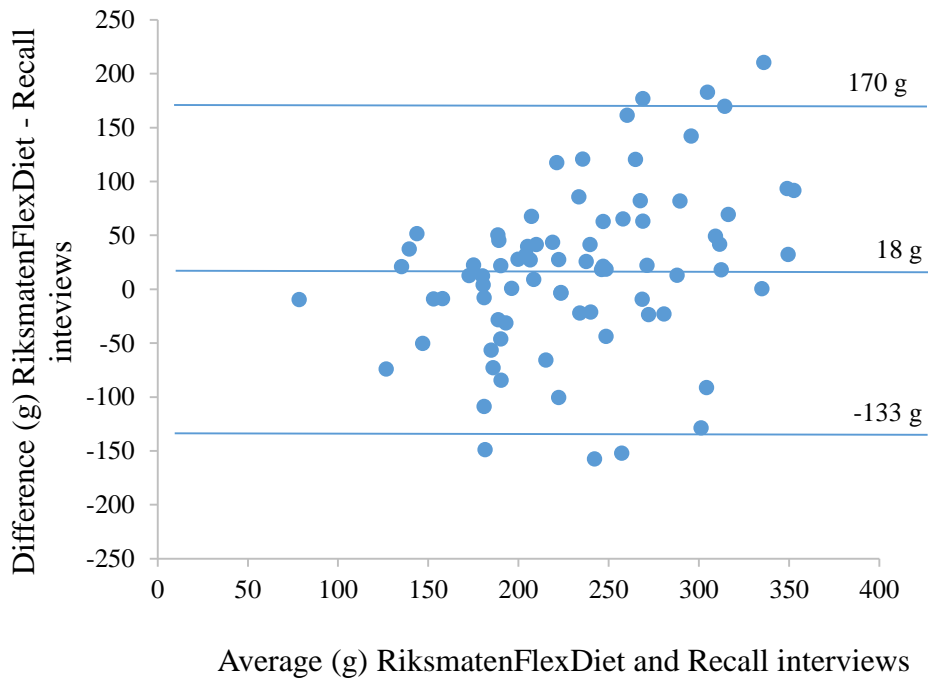

Supplement: jmir_v21i10e12572_app3.pdf [file jmir_v21i10e12572_app3.pdf]
